# Supplementary material for: Mo(vi) complexes of amide–imine conjugates for tuning the selectivity of fluorescence recognition of Y(iii) vs. Pb(ii)
Source: Royal Society of Chemistry journal article supplement (doi:10.1039/d2ra06035c), 2022-01-01
Supplement: d2ra06035c1.pdf [file d2ra06035c1.pdf]

## Electronic Supporting Information (ESI)

### Mo(VI) complexes of amide-imine conjugates for tuning the selectivity of fluorescence recognition of Y(III) vs. Pb(II)

Sudeshna Chatterjee, Sabyasachi Ta, SomnathKhanra, and Debasis Das\*

*Department of Chemistry, The University of Burdwan, Burdwan, 713104, W.B., India*

#### 1. General method of UV-Vis and fluorescence titration

Stock solution of **M1** and **M2** are prepared (20 μM) in HEPES buffered EtOH/H<sub>2</sub>O (4/1, v/v) media, pH 7 for UV-Vis and fluorescence titrations. Working solutions of **M1**, **M2** and Y<sup>3+</sup>, Pb<sup>2+</sup> are prepared from their respective stock solutions. The cells having path length 1 cm are used for absorption and emission studies. Fluorescence measurements have been performed using 5 nm x 5 nm slit width.

#### 2. Job's plot from fluorescence experiment

A series of solutions containing **M1**, **M2** and Y<sup>3+</sup>, Pb<sup>2+</sup> are prepared such that the total concentration of Y<sup>3+</sup>, Pb<sup>2+</sup> and **M1**, **M2** remained constant (20 μM) in all the sets. The mole fractions (x) of **M1** and **M2** are varied from 0.1 to 0.9. The fluorescence intensity at 527 nm and 503 nm for **M1**-Y<sup>3+</sup> and **M1**-Pb<sup>2+</sup> are plotted respectively against the mole fraction of Y<sup>3+</sup> and Pb<sup>2+</sup>. Similarly the fluorescence intensity at 497 nm for **M2**-Y<sup>3+</sup> is plotted against the mole fraction of Y<sup>3+</sup>.

#### 3. Determination of binding constant

The binding constants of **M1** and **M2** for sensed cations are determined using Benesi-Hildebrand equation:

$$\frac{F_{max} - F_{min}}{F_x - F_{min}} = 1 + \frac{1}{K[C]^n}$$

Here **F<sub>min</sub>**, **F<sub>x</sub>**, and **F<sub>max</sub>** are the emission intensities of **M1** and **M2** in absence of cation, at an intermediate cation concentration, and at a concentration of complete interaction with cation respectively. **K** is the binding constant, **C** is the concentration of cation and **n** is the number of cation bound per molecule (here, **n** = 1). The value of **K** can be determined from the slopes of the plots.

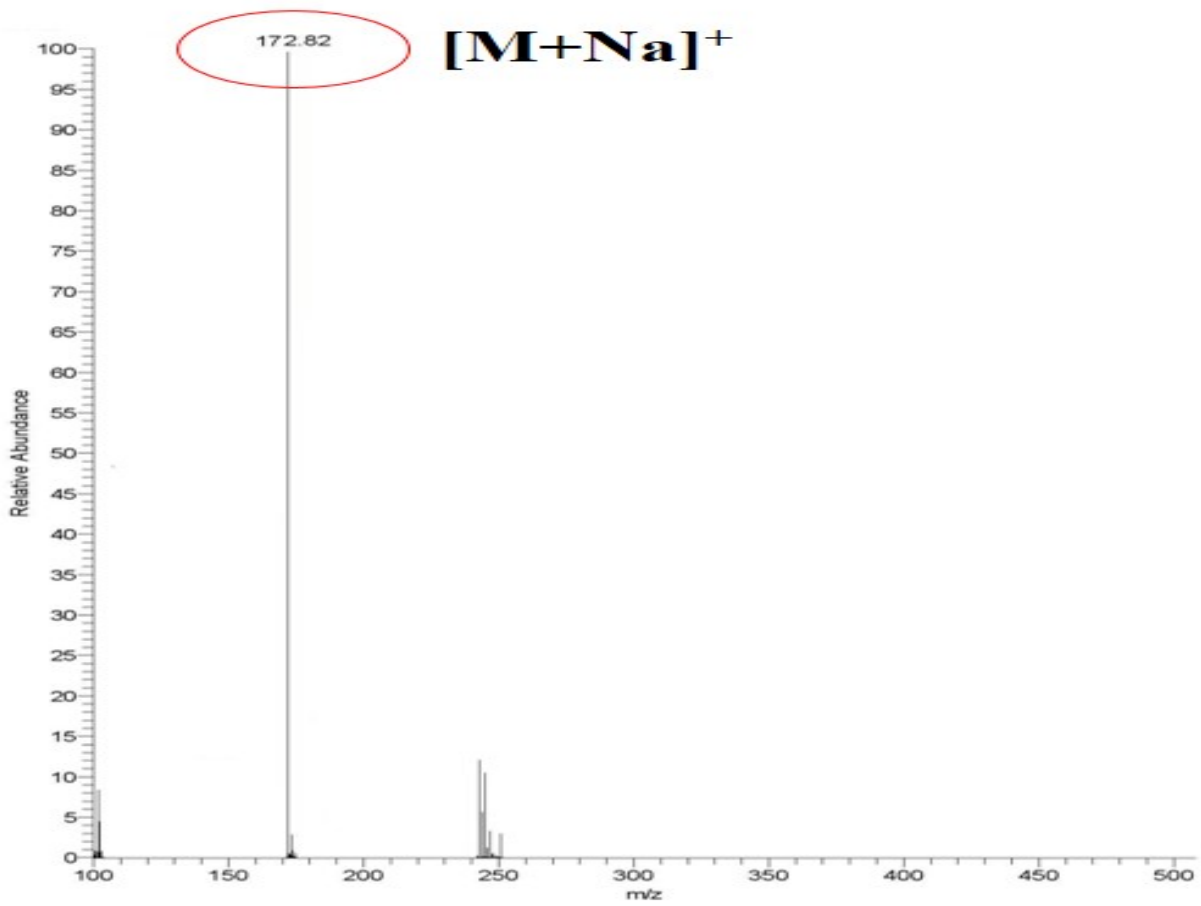

Figure S1aQTOF mass spectrum of MTA

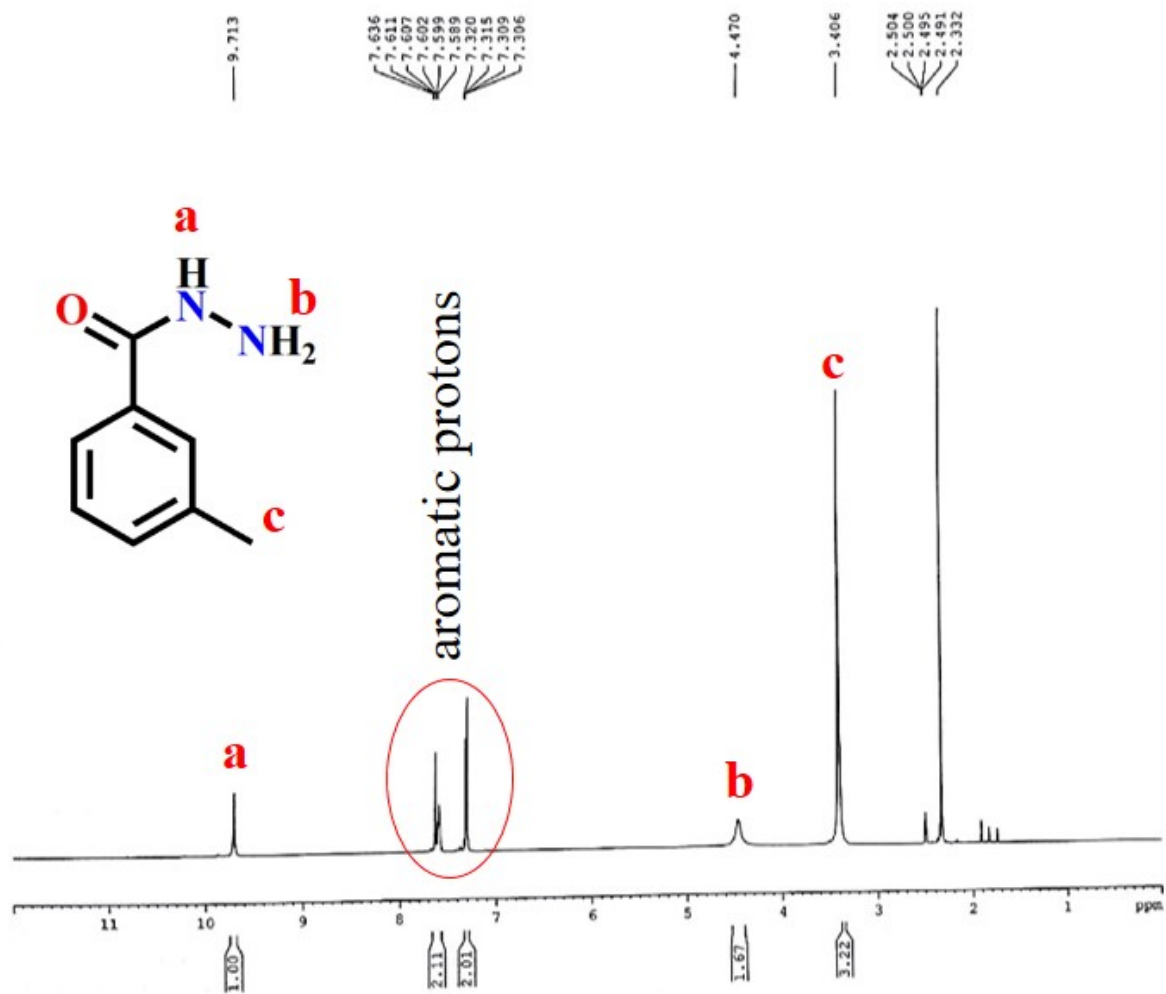

Figure S1b <sup>1</sup>H NMR spectrum of MTA in DMSO-*d*<sub>6</sub>

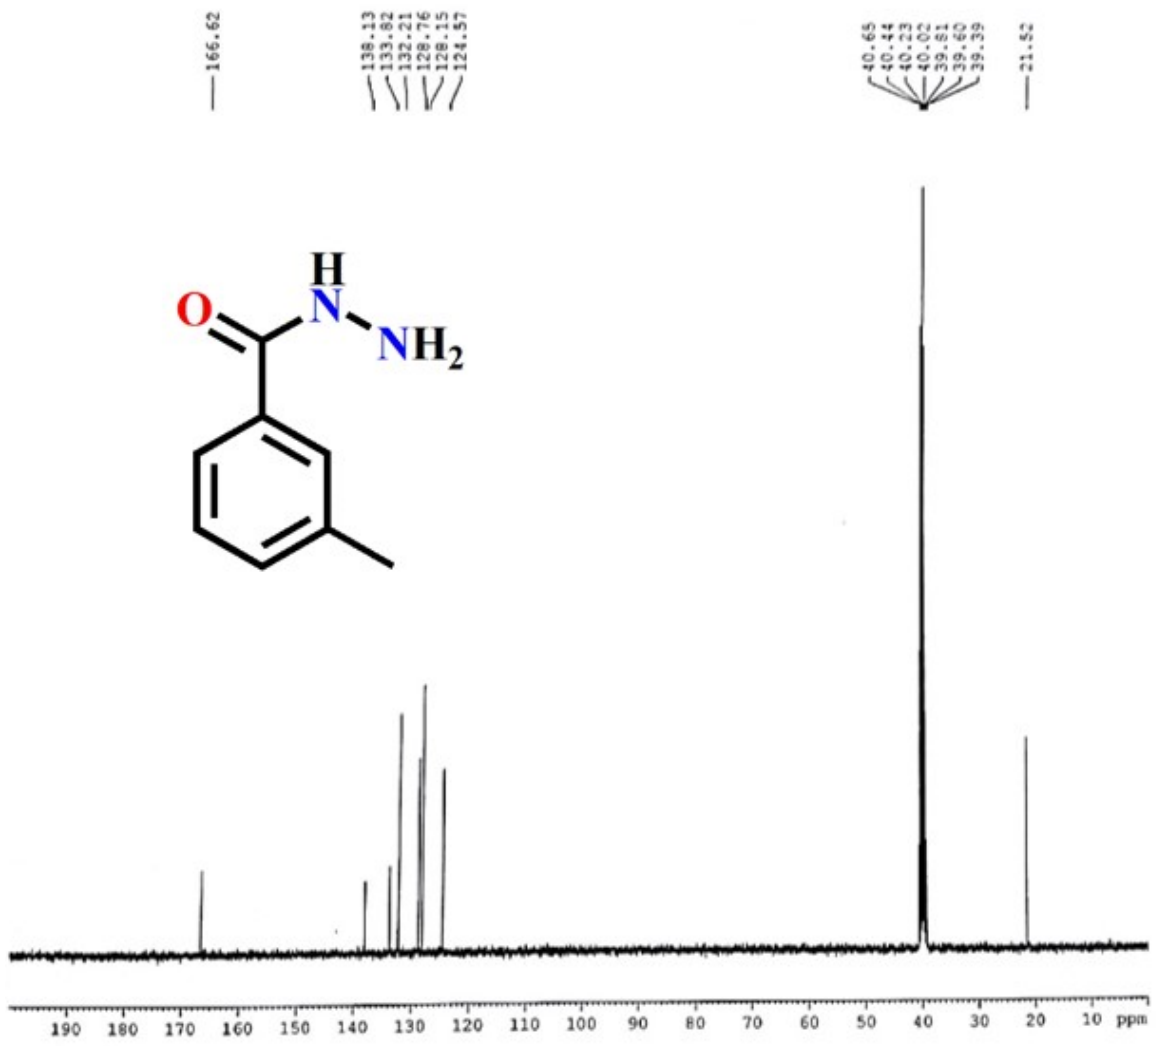

Figure S1c <sup>13</sup>C NMR spectrum of MTA

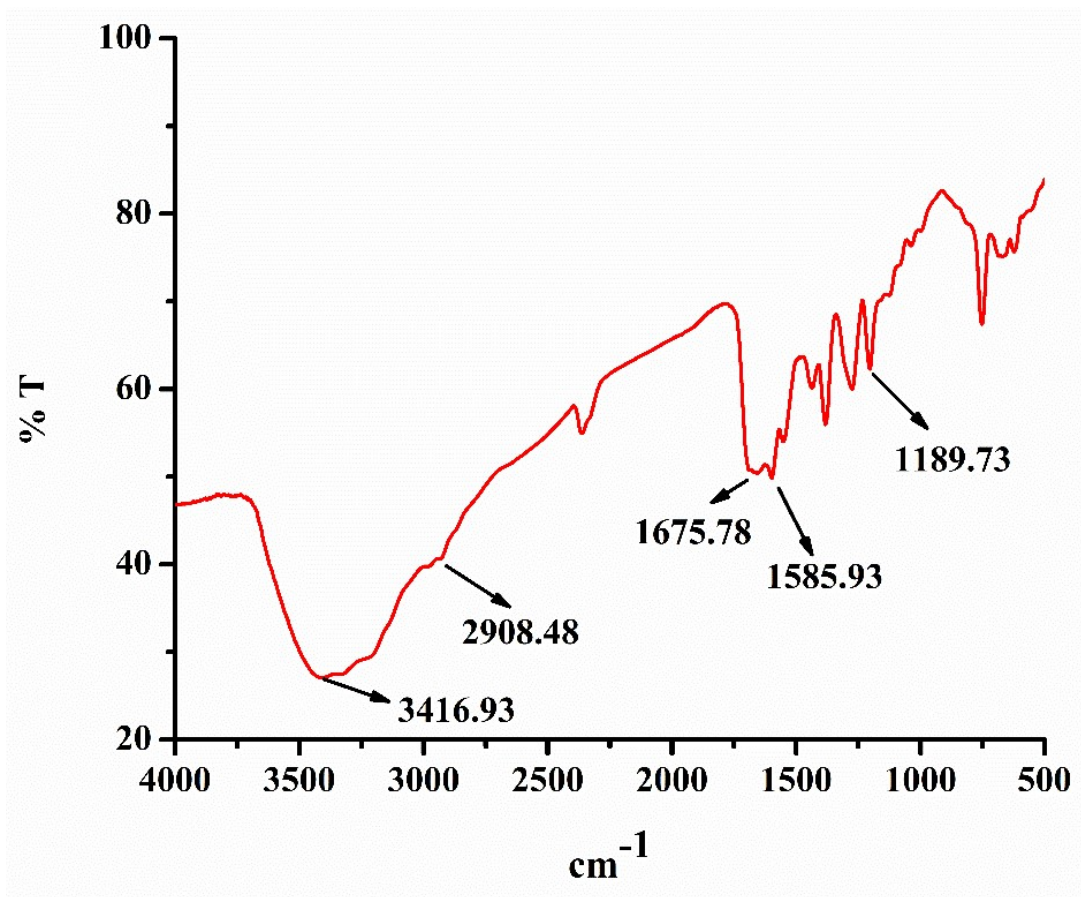

Figure S1d FTIR spectrum of MTA

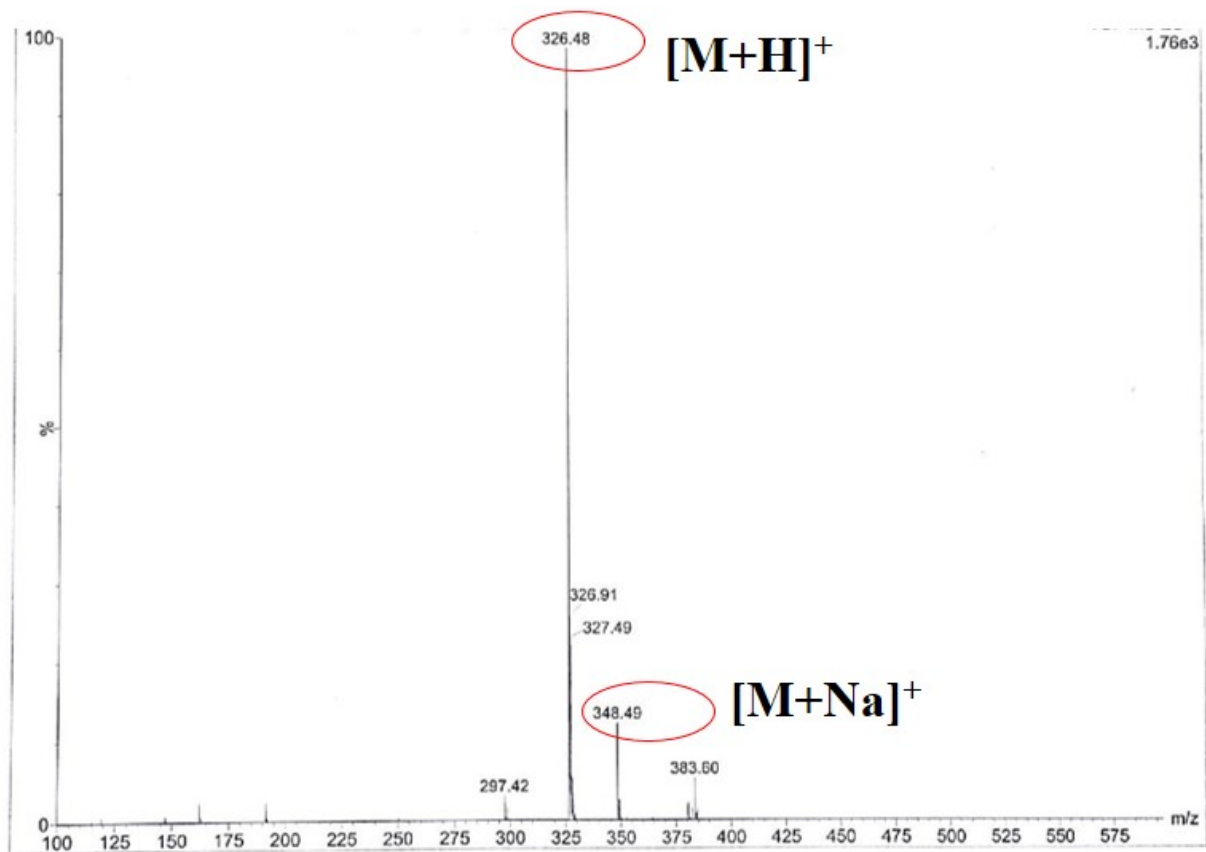

Figure S2aQTOF mass spectrum of L1

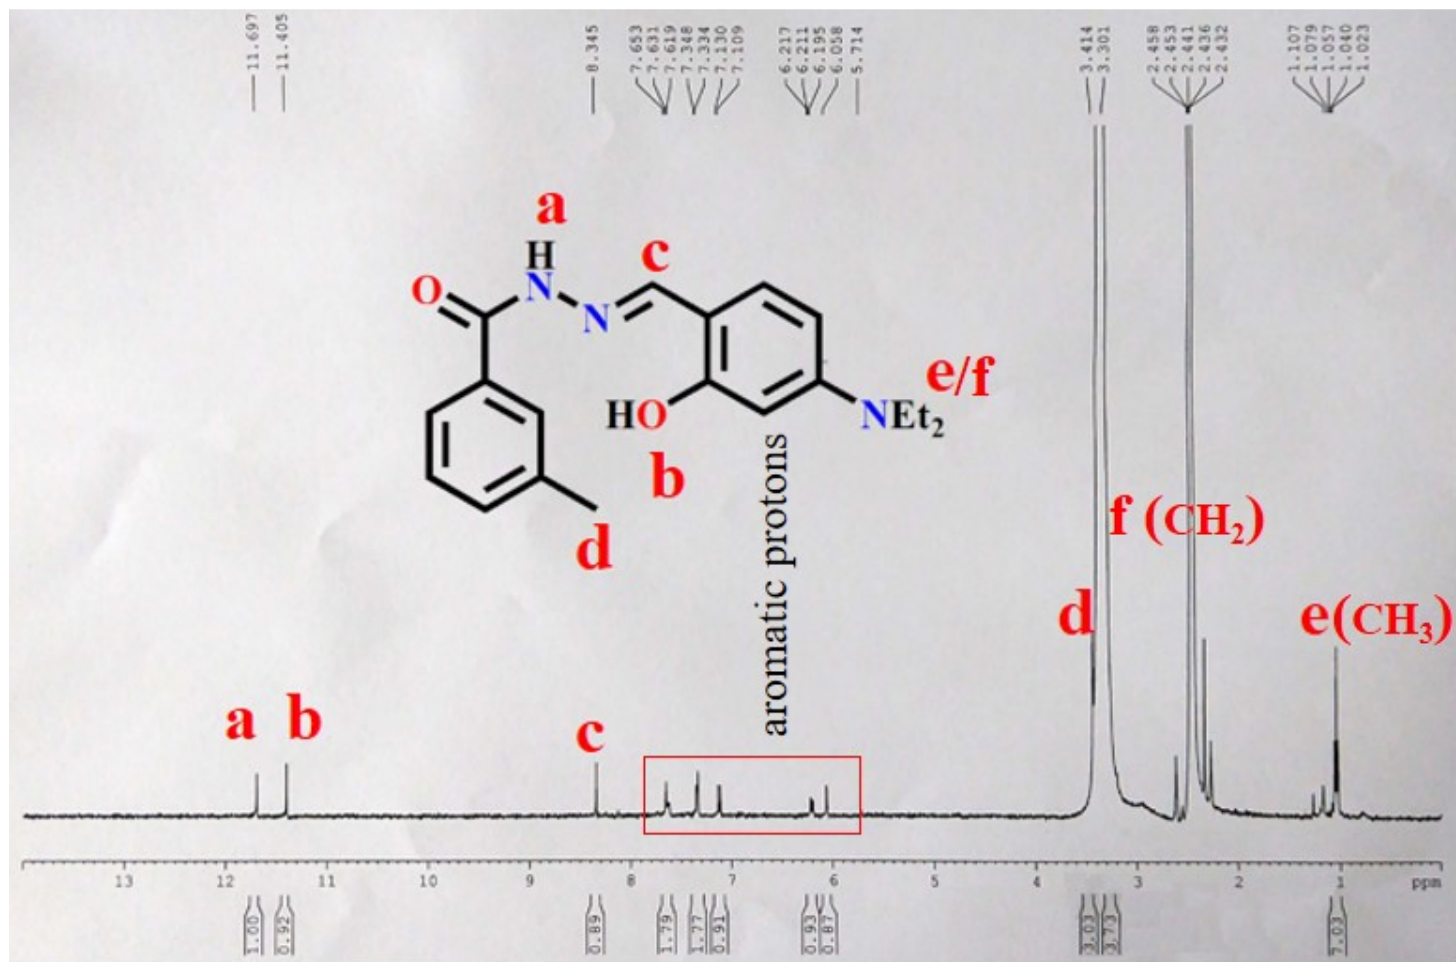

Figure S2b  $^1\text{H}$  NMR spectrum of L1 in DMSO- $d_6$

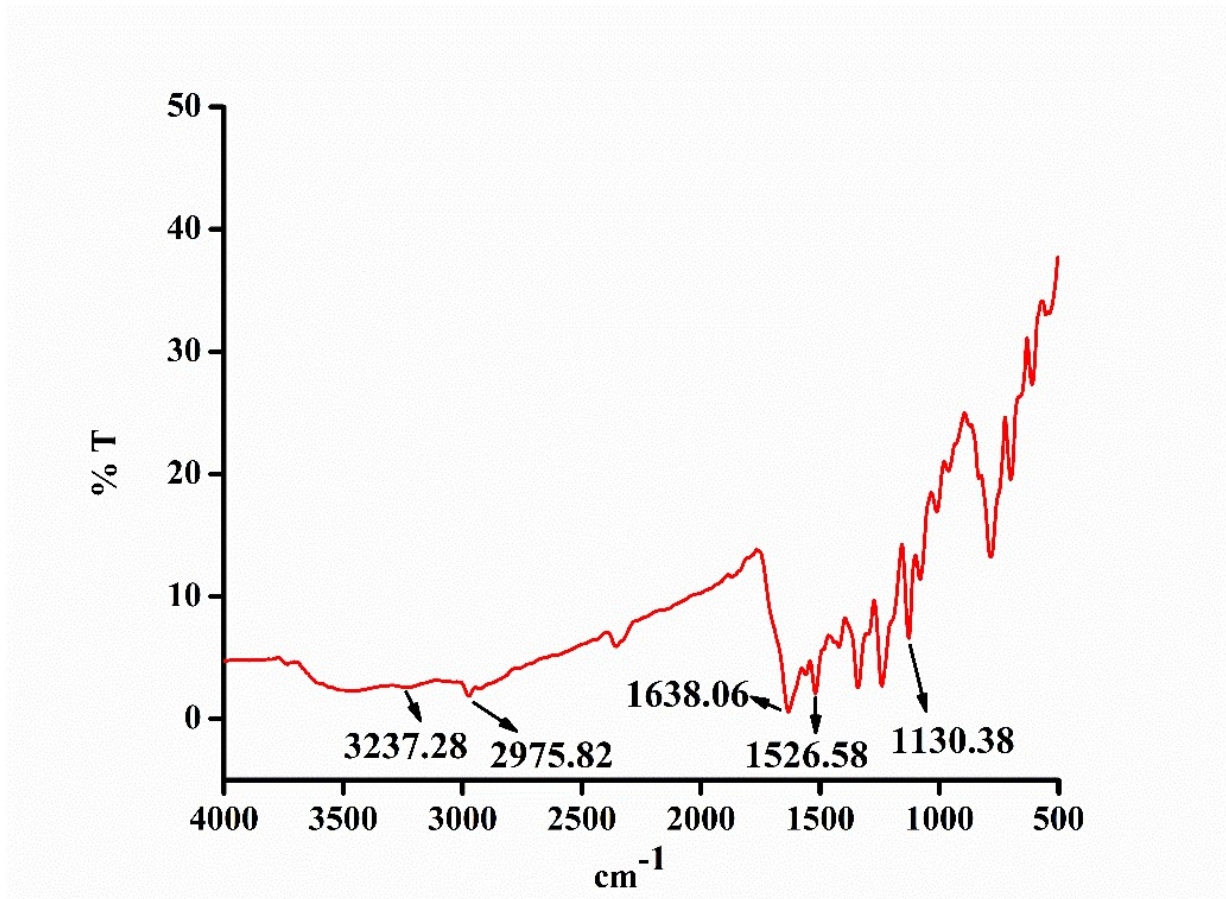

**Figure S2c** FTIR spectrum of L1



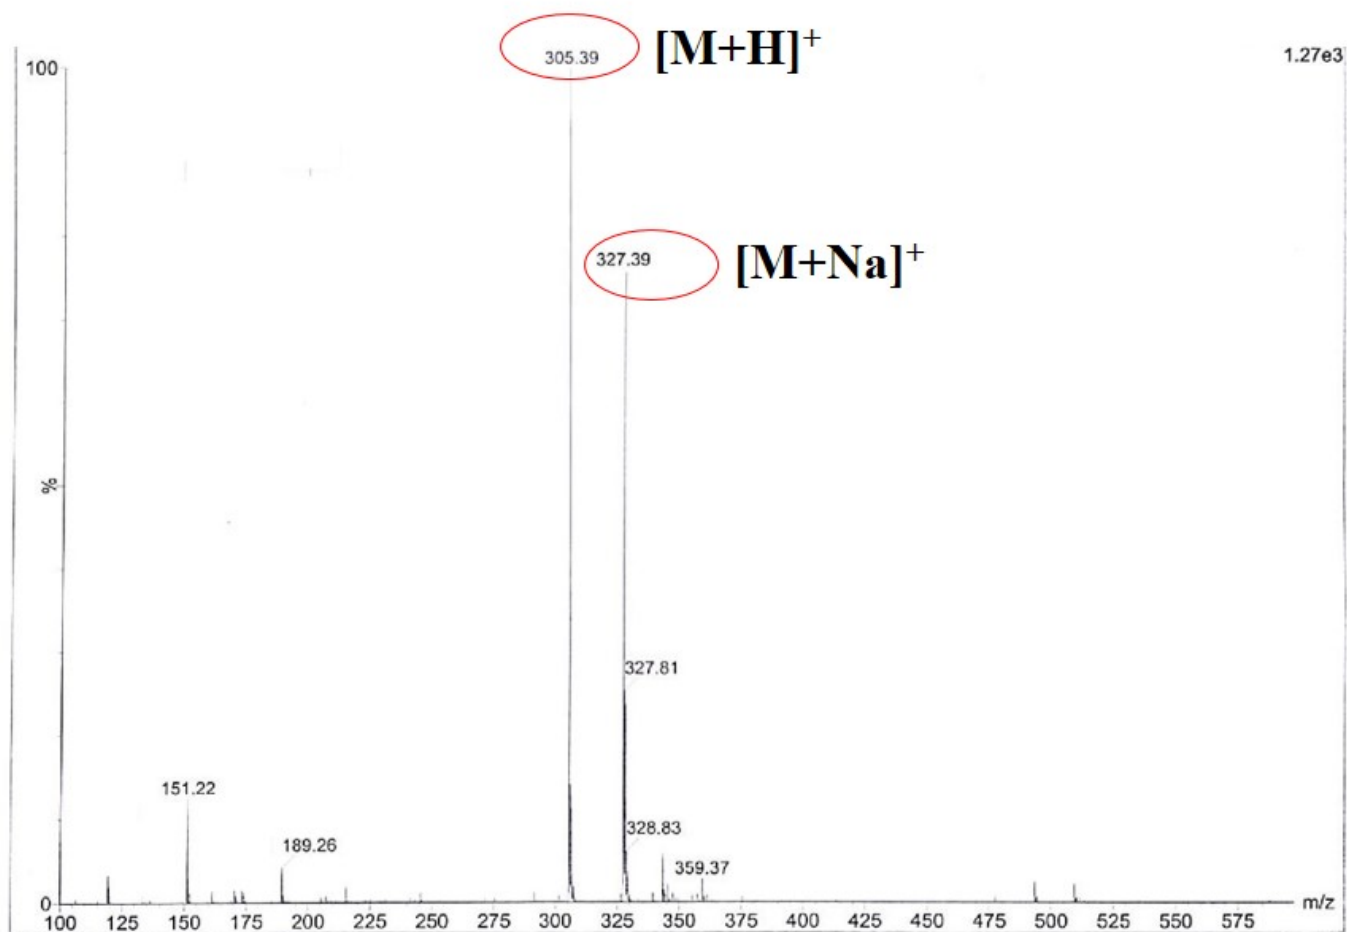

**Figure S3a** QTOF mass spectrum of **L2**

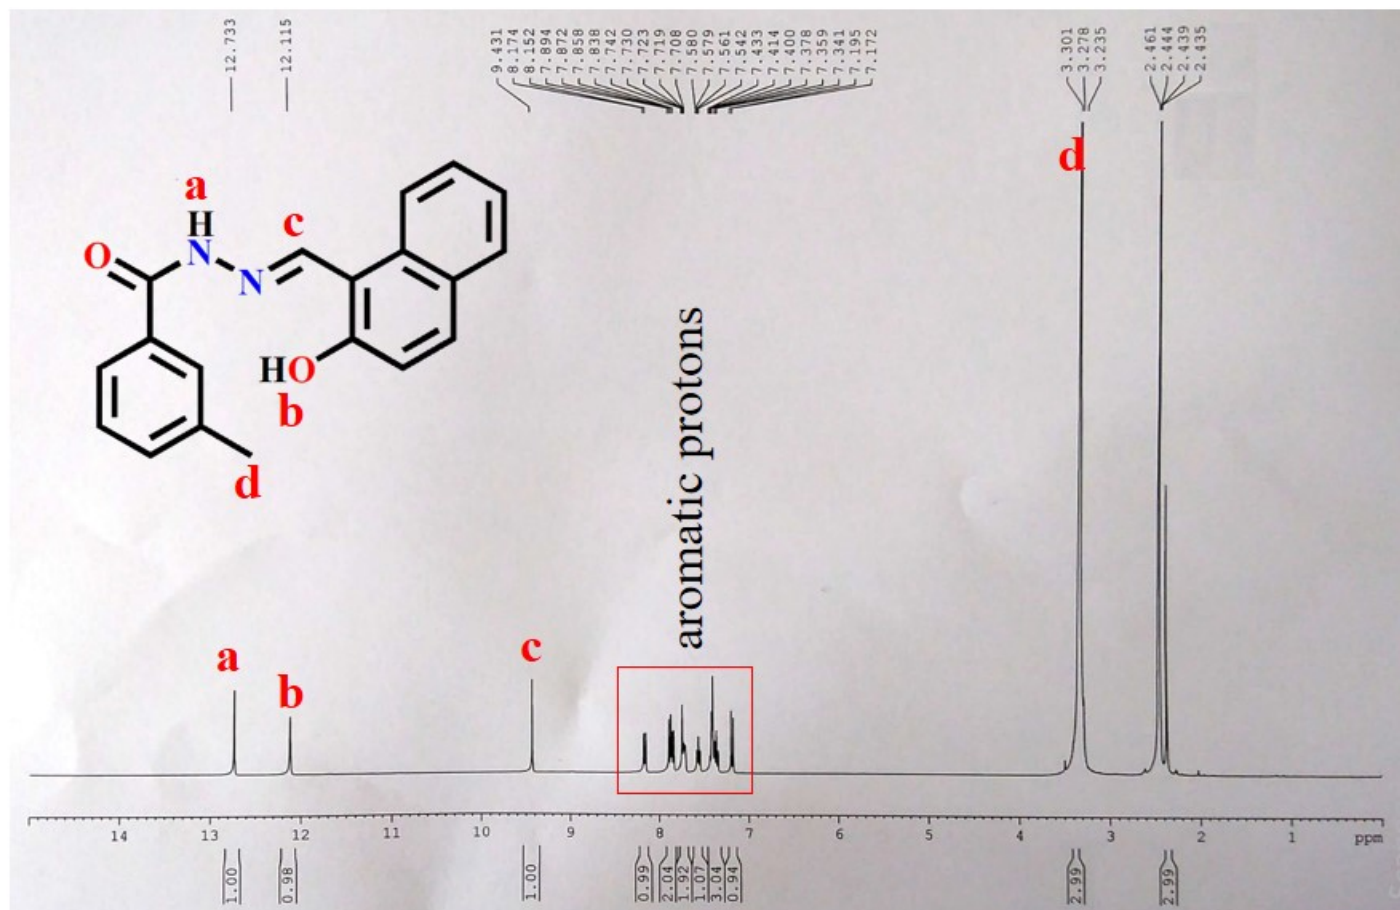

Figure S3b  $^1\text{H}$  NMR spectrum of L2 in  $\text{DMSO-}d_6$

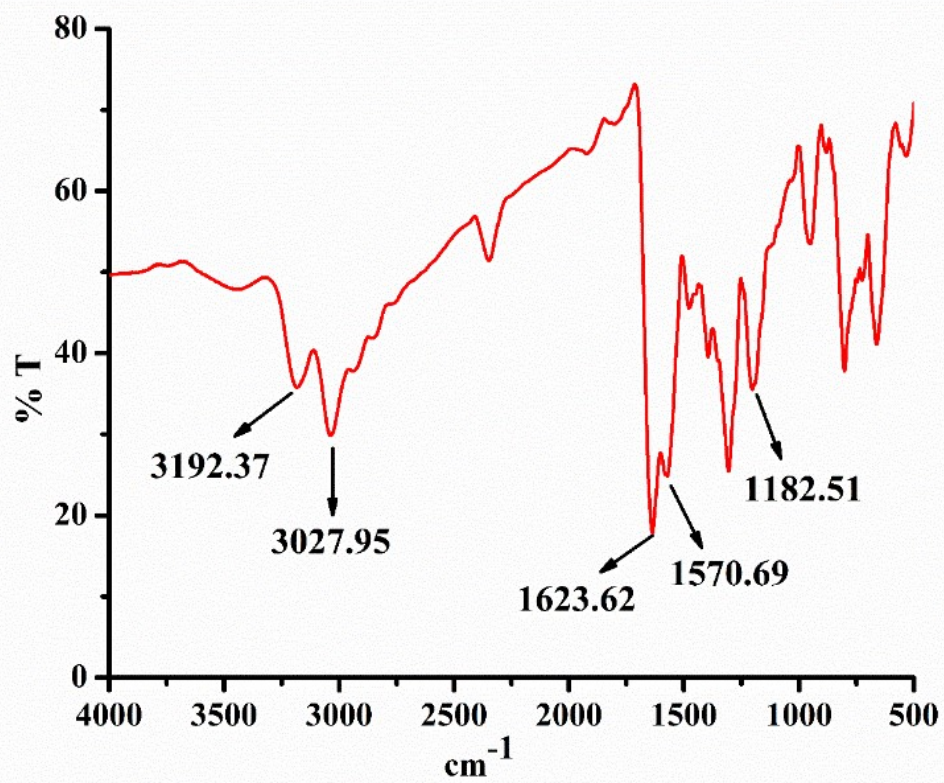

**Figure S3c** FTIR spectrum of L2



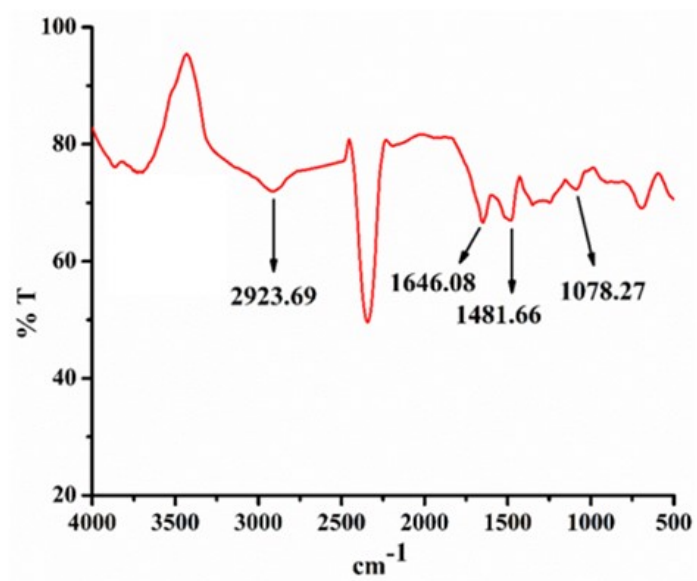

**Figure S4b** FTIR spectrum of **M1**

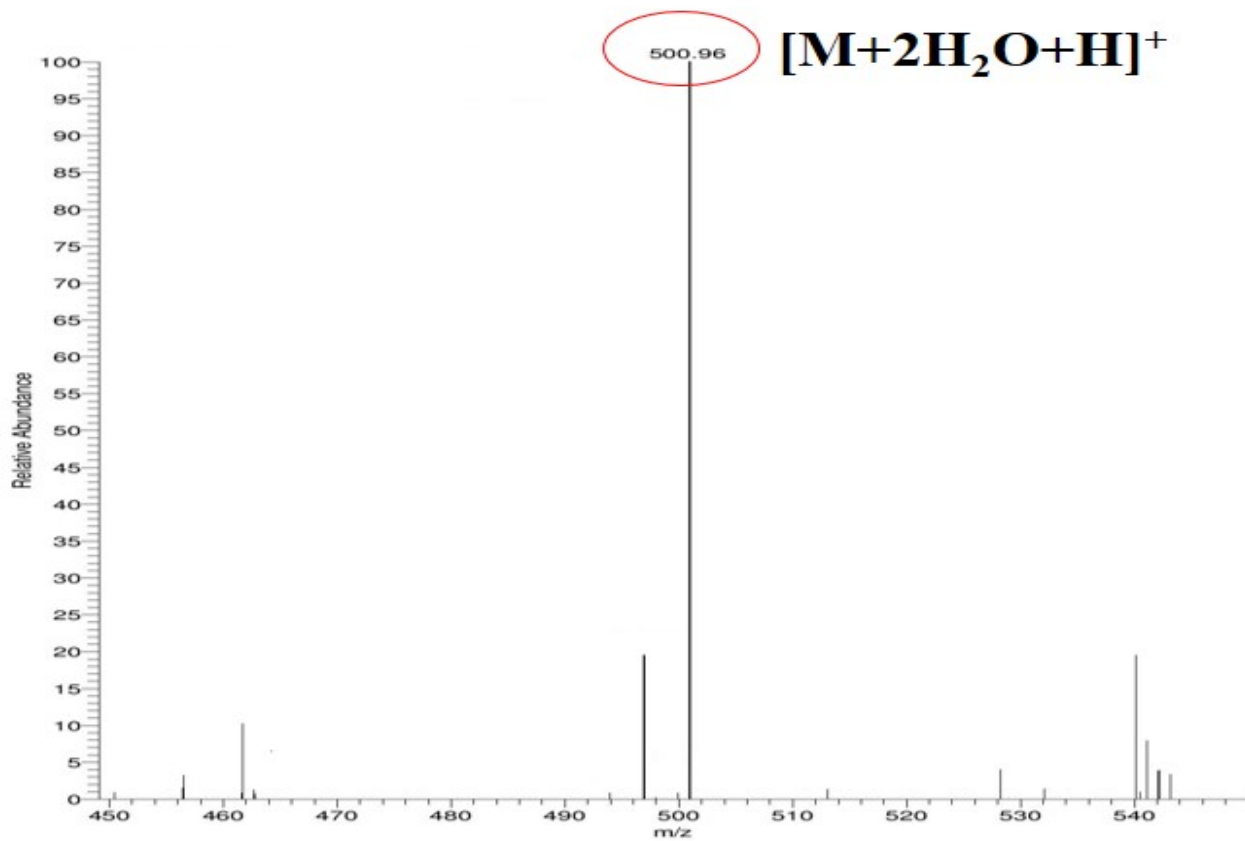

Figure S5aQTOF mass spectrum of M2

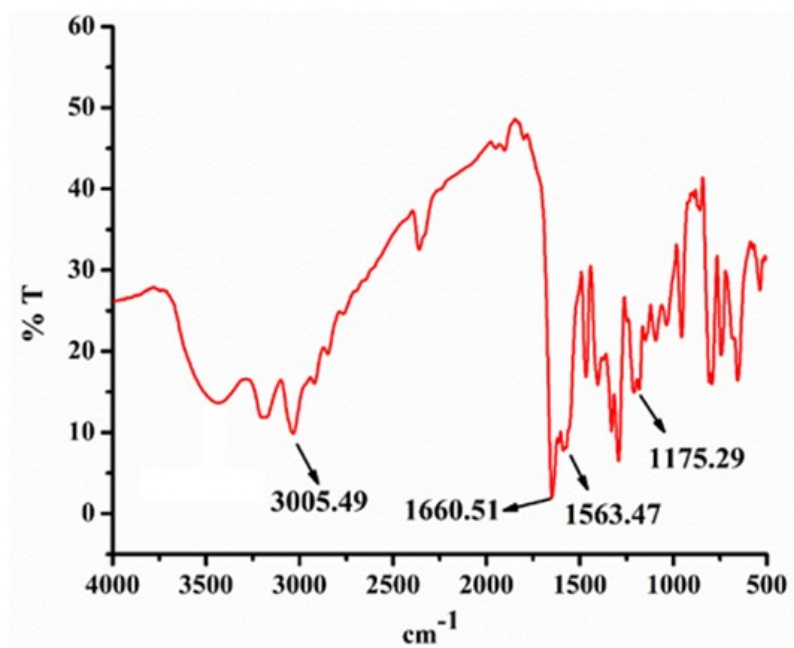

**Figure S5b** FTIR spectrum of M2

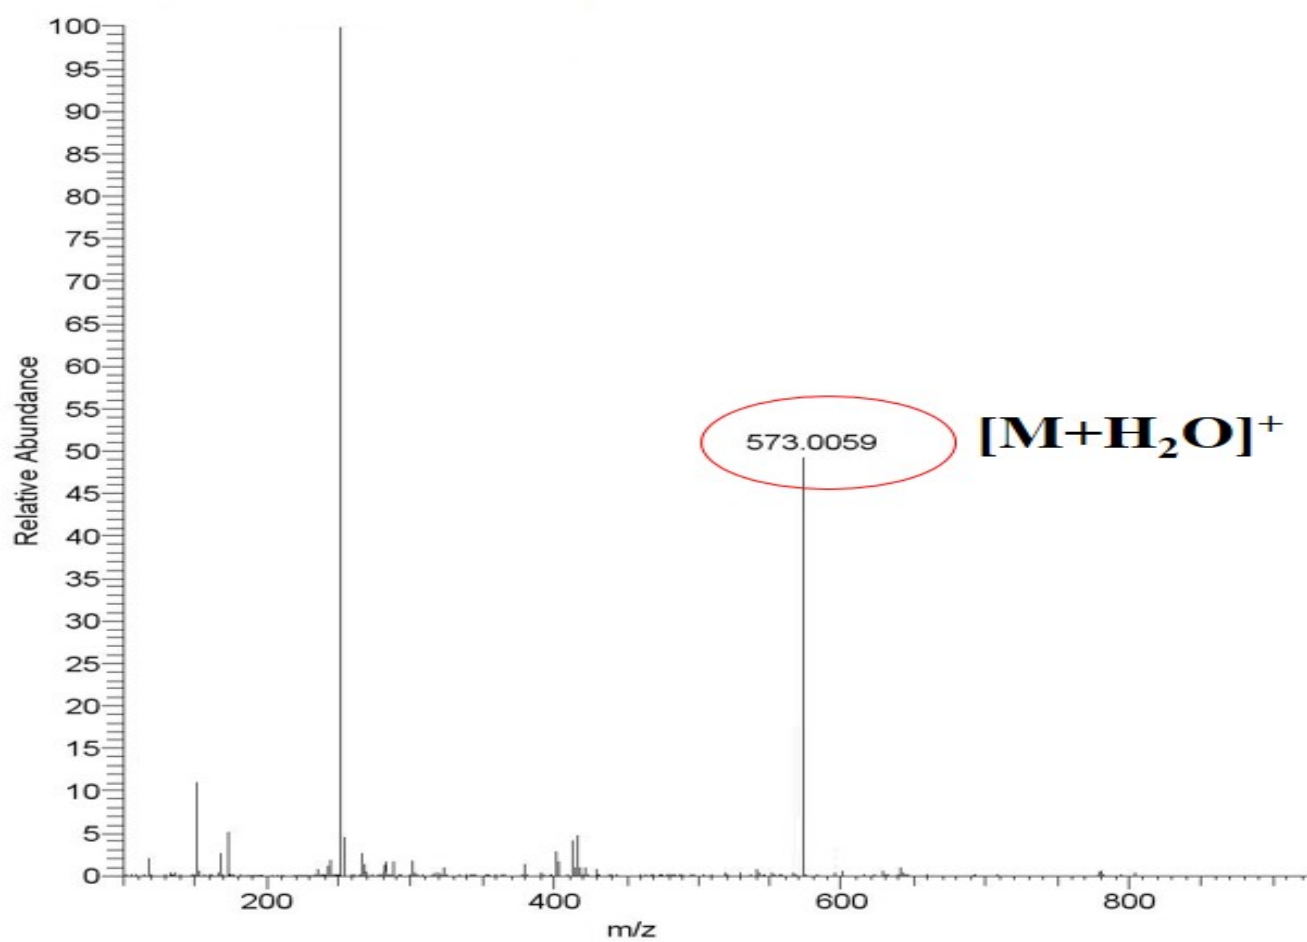

**Figure S6a**QTOF mass spectrum of Y1



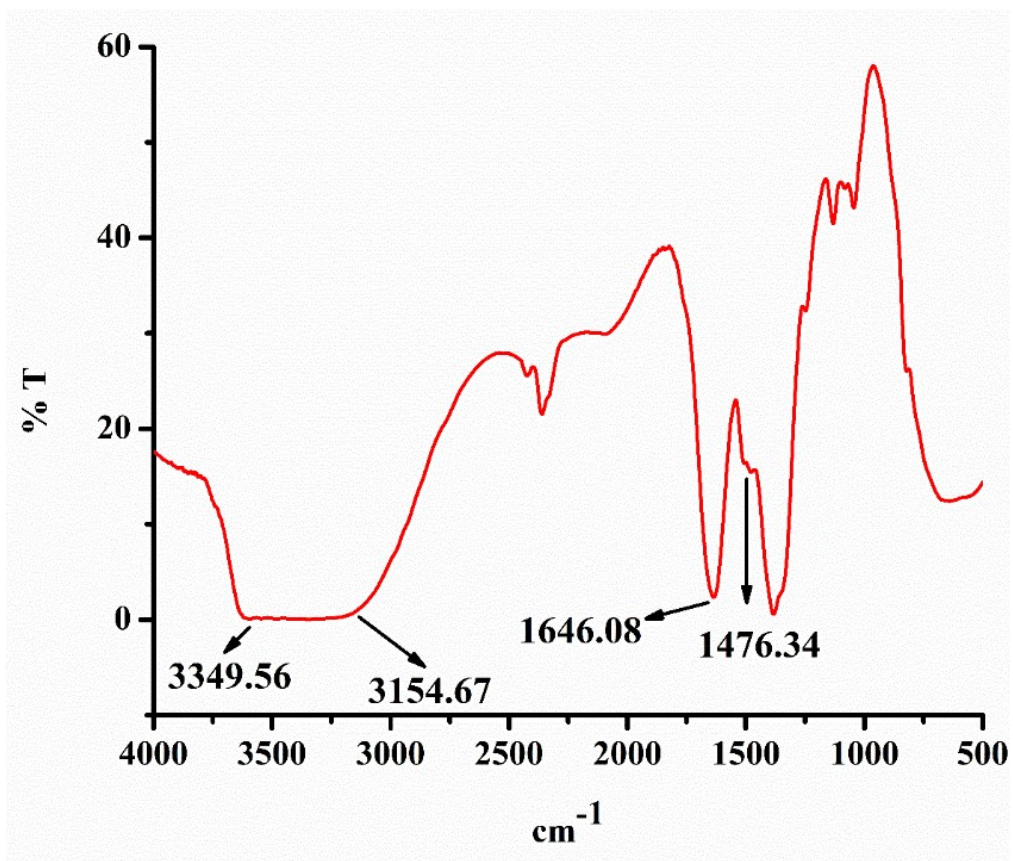

Figure S6b FTIR spectrum of Y1

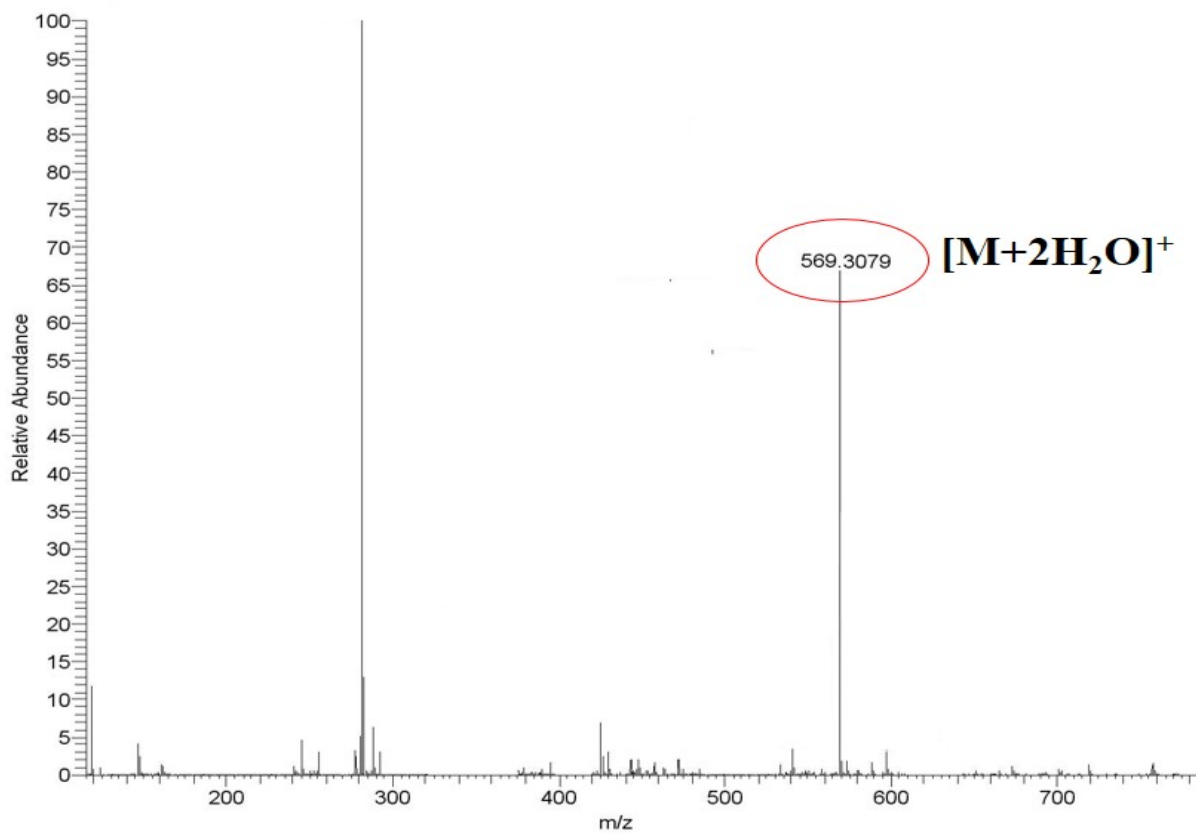

Figure S7a QTOF mass spectrum of Y2

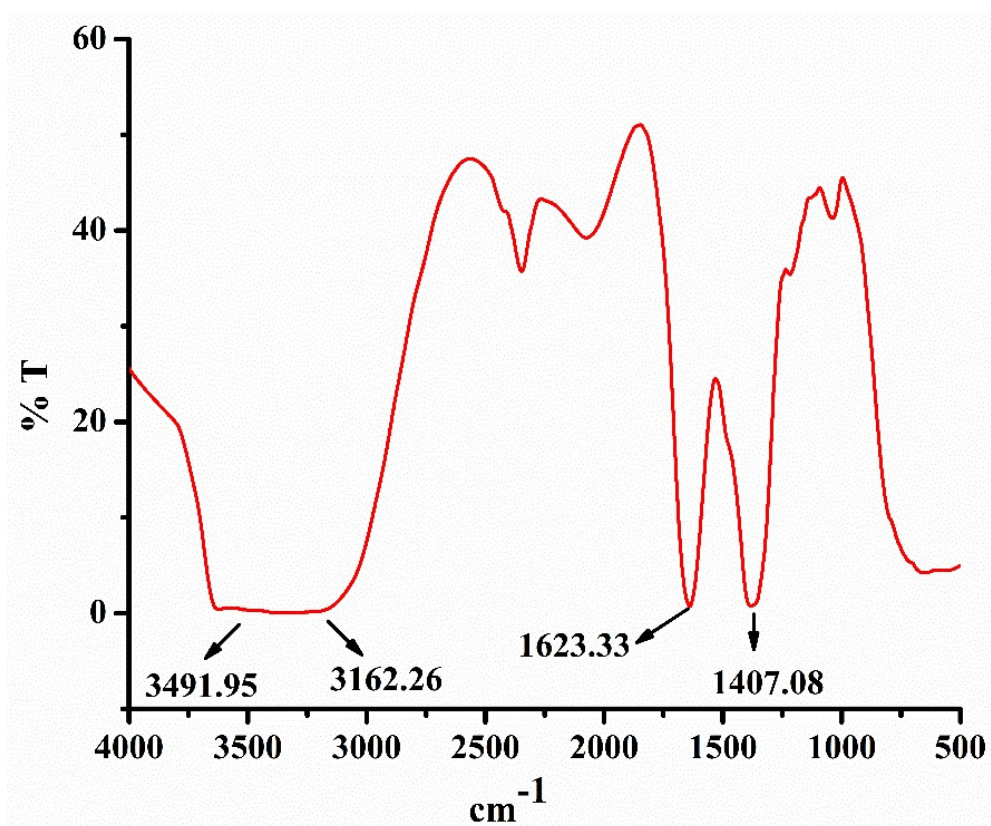

Figure S7b FTIR spectrum of Y2

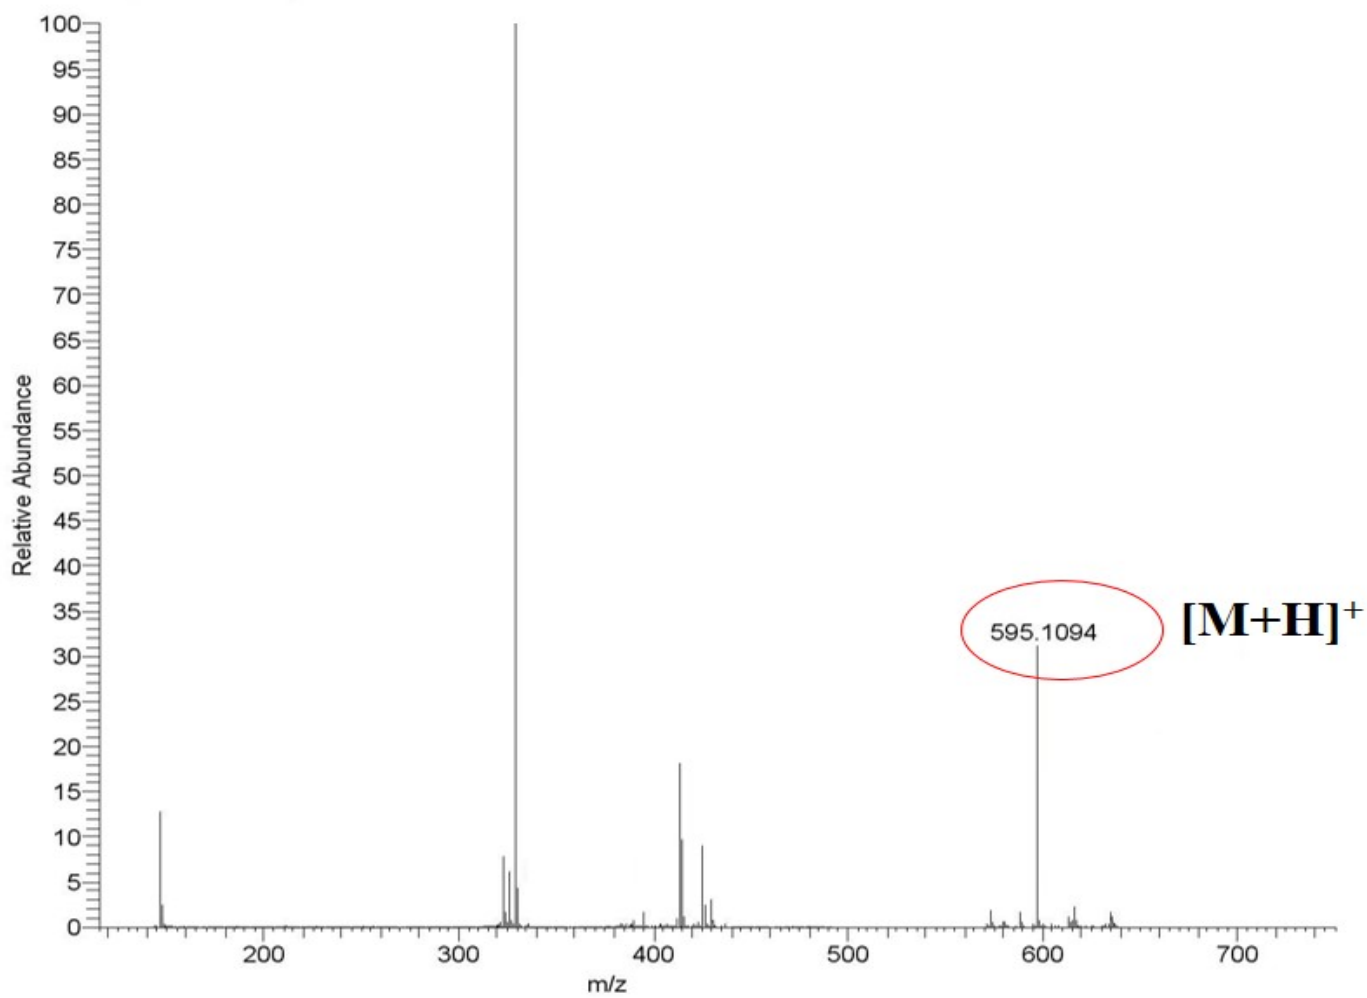

**Figure S8a** QTOF mass spectrum of **P1**

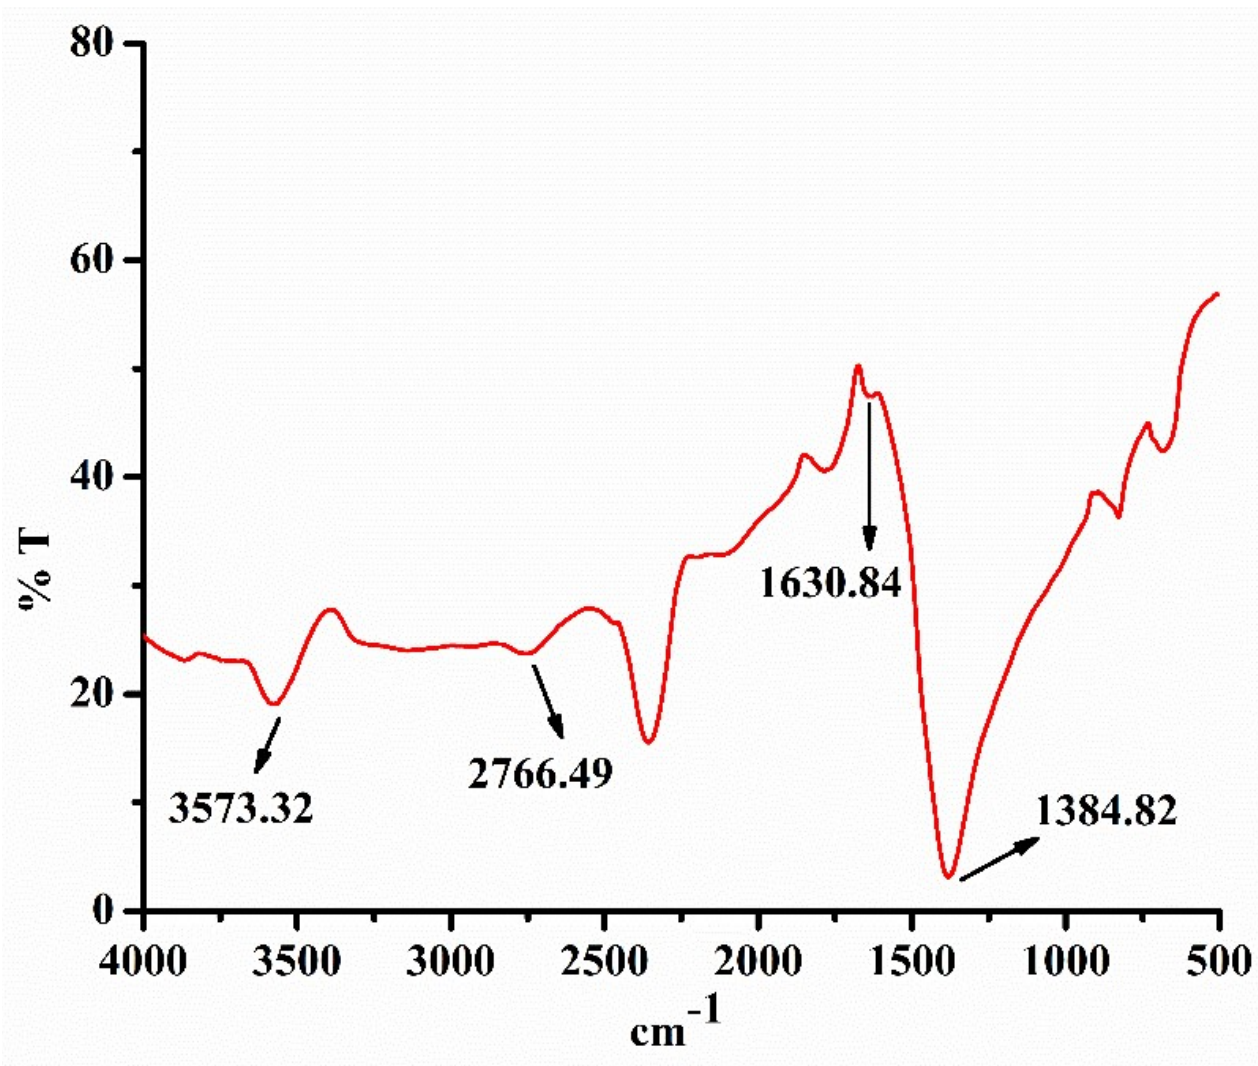

Figure S8b FTIR spectrum of P1

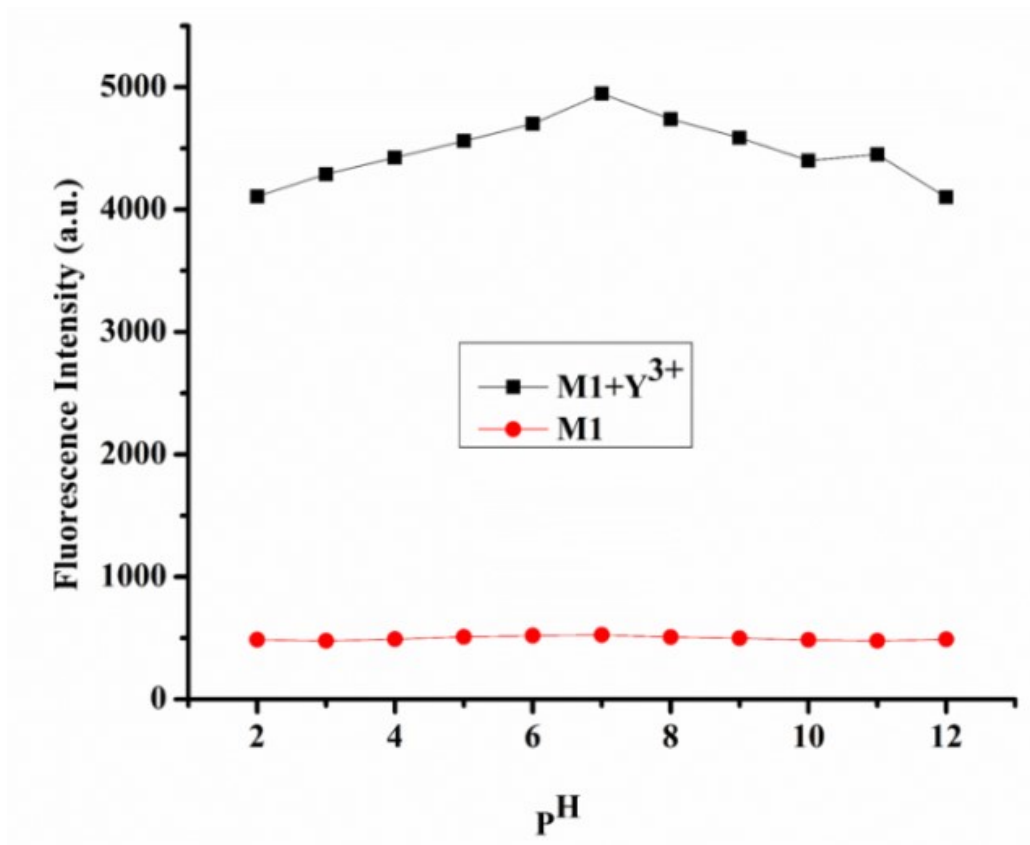

**Figure S9a** Effect of pH on the emission intensities of **M1** ( $\lambda_{\text{ex}} = 410 \text{ nm}$ ,  $\lambda_{\text{em}} = 527 \text{ nm}$ ) in presence and absence of  $\text{Y}^{3+}$

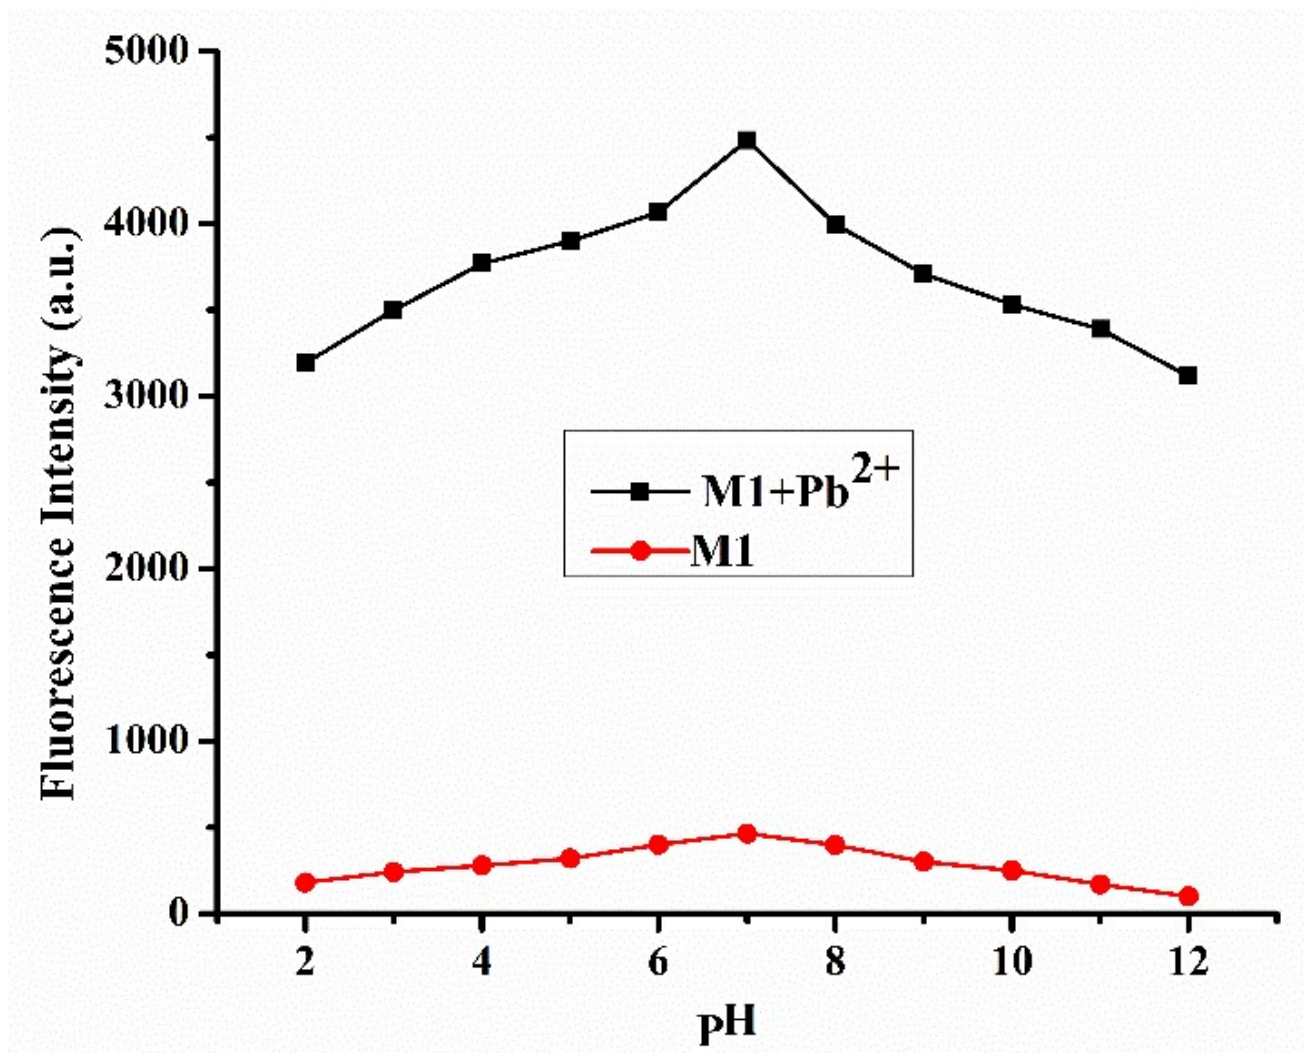

**Figure S9b** Effect of pH on the emission intensities of compound **M1** ( $\lambda_{\text{ex}} = 410 \text{ nm}$ ,  $\lambda_{\text{em}} = 463 \text{ nm}$ ) in presence and absence of  $\text{Pb}^{2+}$

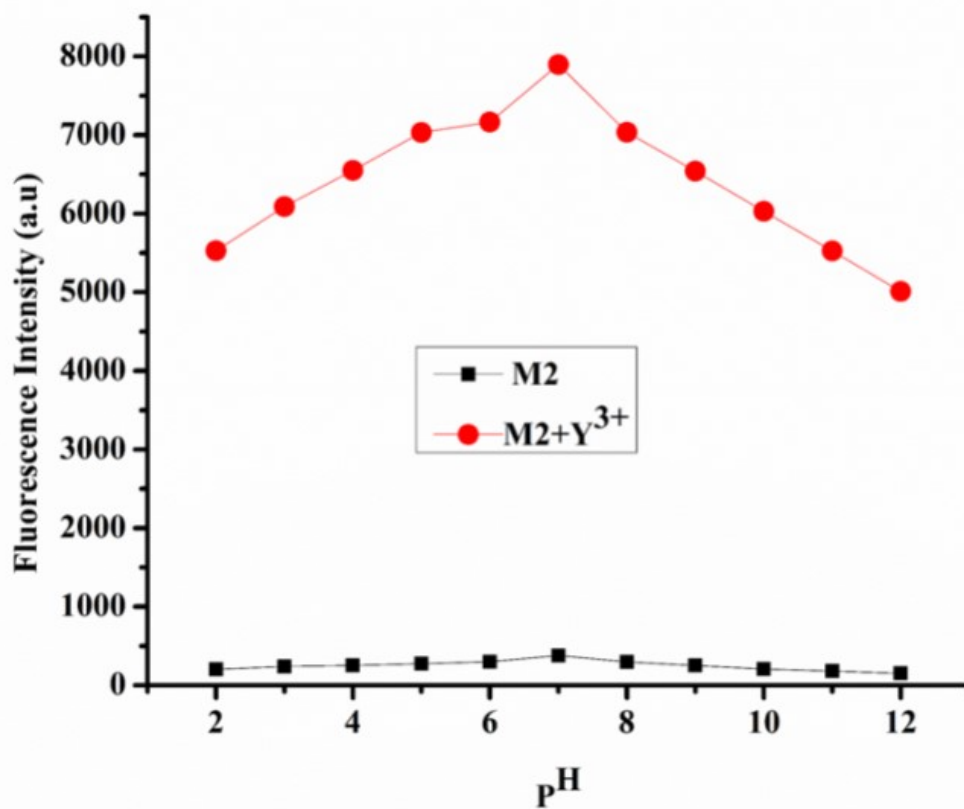

**Figure S9c** Effect of pH on the emission intensities of **M2** ( $\lambda_{\text{ex}}=342\text{ nm}, \lambda_{\text{em}}=497\text{ nm}$ ) in presence and absence of  $\text{Y}^{3+}$

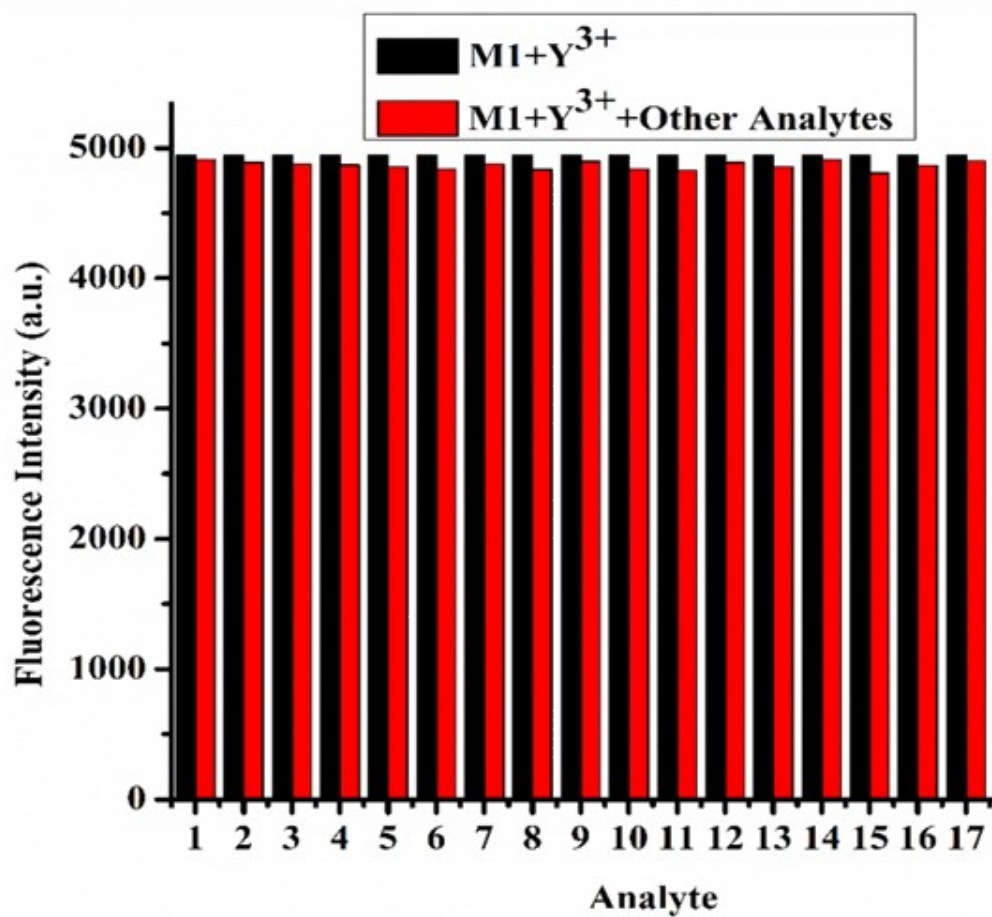

**Figure S10a** Interference plots (cations) of **M1** for  $Y^{3+}$  in fluorescence ( $\lambda_{ex} = 410$  nm,  $\lambda_{em} = 527$  nm). 1;  $Cu^{2+}$ , 2;  $Cr^{3+}$ , 3;  $Mn^{2+}$ , 4;  $Fe^{2+}$ , 5;  $Fe^{3+}$ , 6;  $Co^{2+}$ , 7;  $Ni^{2+}$ , 8;  $Al^{3+}$ , 9;  $Zn^{2+}$ , 10;  $Ag^+$ , 11;  $Cd^{2+}$ , 12;  $Hg^{2+}$ , 13;  $La^{3+}$ , 14;  $Ce^{4+}$ , 15;  $Gd^{3+}$ , 16;  $Tb^{3+}$ , and 17;  $Dy^{3+}$



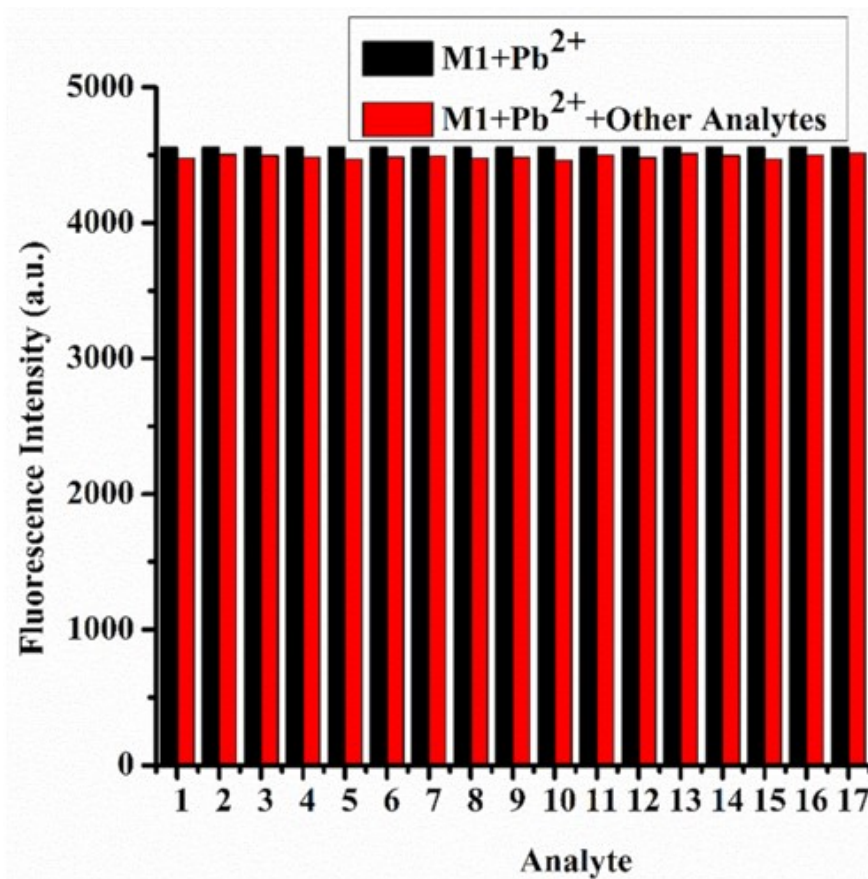

**Figure S10b** Interference plots (cations) of **M1** for Pb<sup>2+</sup> in fluorescence ( $\lambda_{\text{ex}} = 410 \text{ nm}$ ,  $\lambda_{\text{em}} = 463 \text{ nm}$ ). 1; Cu<sup>2+</sup>, 2; Cr<sup>3+</sup>, 3; Mn<sup>2+</sup>, 4; Fe<sup>2+</sup>, 5; Fe<sup>3+</sup>, 6; Co<sup>2+</sup>, 7; Ni<sup>2+</sup>, 8; Al<sup>3+</sup>, 9; Zn<sup>2+</sup>, 10; Ag<sup>+</sup>, 11; Cd<sup>2+</sup>, 12; Hg<sup>2+</sup>, 13; La<sup>3+</sup>, 14; Ce<sup>4+</sup>, 15; Gd<sup>3+</sup>, 16; Tb<sup>3+</sup> and 17; Dy<sup>3+</sup>

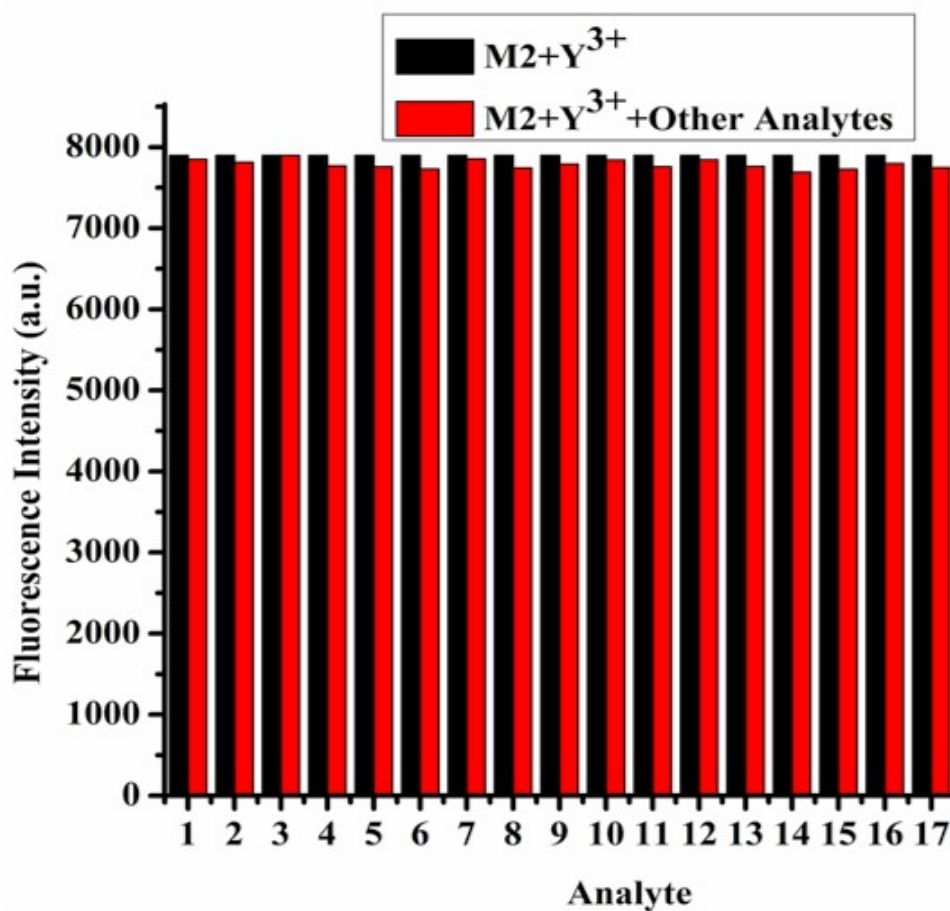

**Figure S10c** Interference plots (cations) of **M2** for  $Y^{3+}$  in fluorescence ( $\lambda_{ex} = 342$  nm,  $\lambda_{em} = 497$  nm). . 1;  $Cu^{2+}$ , 2;  $Cr^{3+}$ , 3;  $Mn^{2+}$ , 4;  $Fe^{2+}$ , 5;  $Fe^{3+}$ , 6;  $Co^{2+}$ , 7;  $Ni^{2+}$ , 8;  $Al^{3+}$ , 9;  $Zn^{2+}$ , 10;  $Ag^+$ , 11;  $Cd^{2+}$ , 12;  $Hg^{2+}$ , 13;  $La^{3+}$ , 14;  $Ce^{4+}$ , 15;  $Gd^{3+}$ , 16;  $Tb^{3+}$  and 17;  $Dy^{3+}$

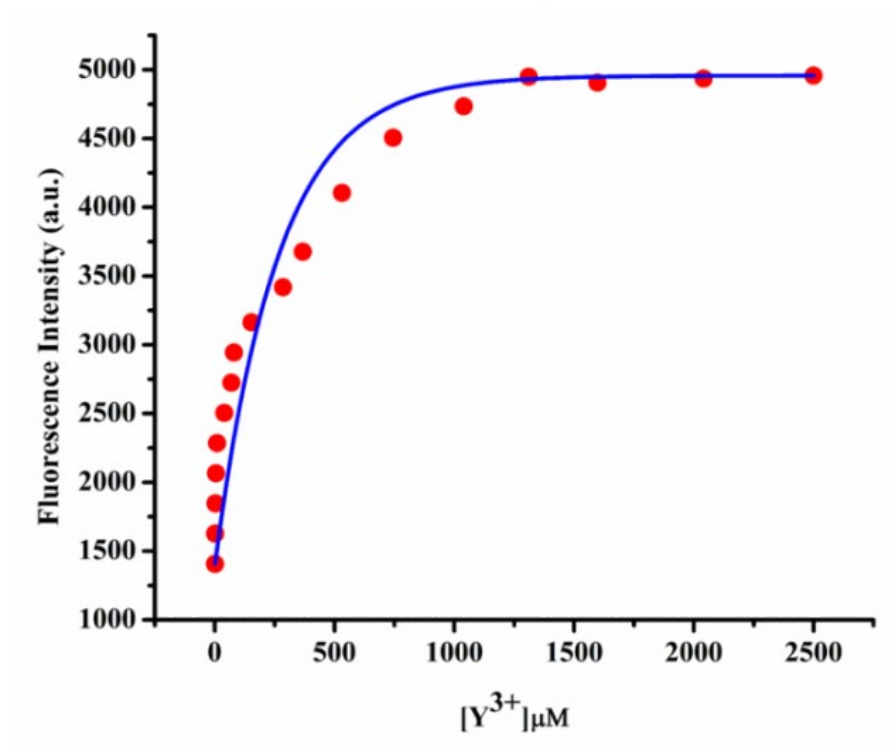

**Figure S11a** Plot of emission intensities of **M1** (20 μM,  $\lambda_{\text{ex}} = 410$  nm,  $\lambda_{\text{em}} = 527$  nm) as a function of externally added Y<sup>3+</sup>(1.0-2500 μM)

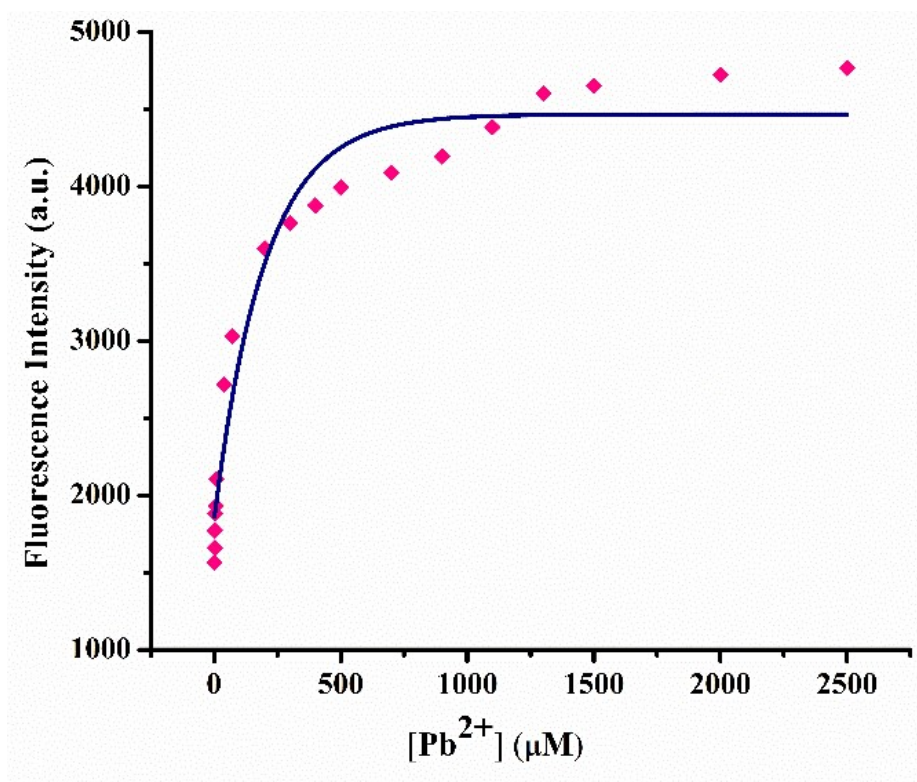

**Figure S11b** Plot of emission intensities of **M1** (20 μM,  $\lambda_{\text{ex}} = 410$  nm,  $\lambda_{\text{em}} = 463$  nm) as a function of externally added Pb<sup>2+</sup>(1.0-2500 μM).

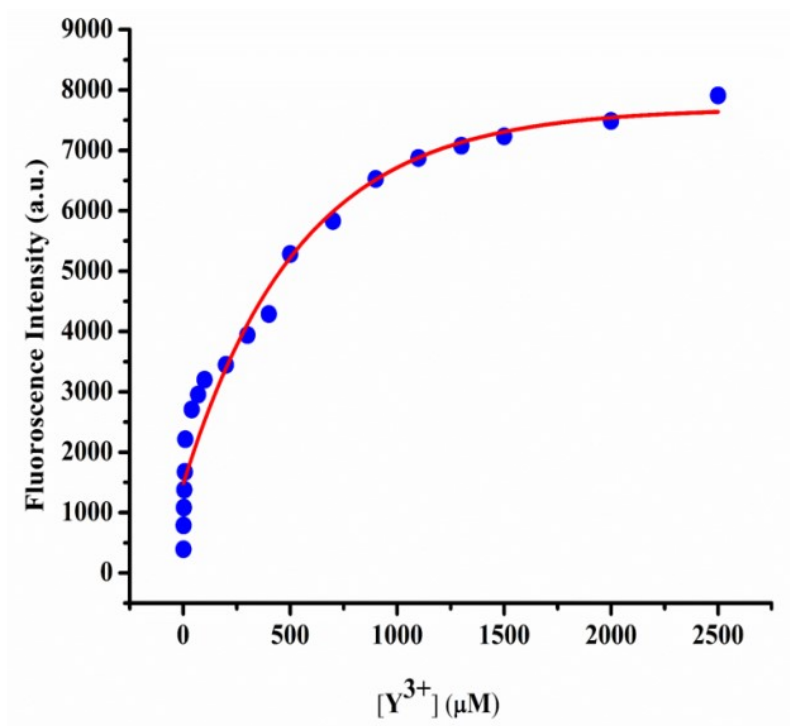

**Figure S11c** Plot of emission intensities of **M2** (20  $\mu M$ ,  $\lambda_{ex}$  = 342 nm,  $\lambda_{em}$  = 497 nm) as a function of externally added  $Y^{3+}$  (1.0-2500  $\mu M$ )

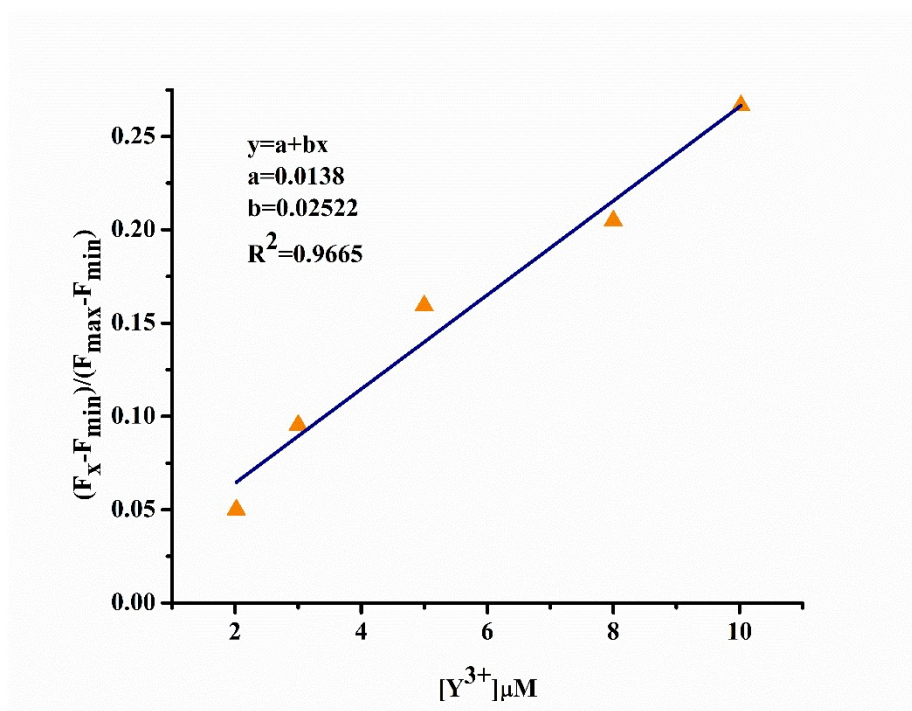

**Figure S12a** Determination of the detection limit based on change in the ratio ( $\lambda_{ex}$  = 410nm,  $\lambda_{em}$  = 527nm) of **M1** (20  $\mu M$ ) with  $Y^{3+}$

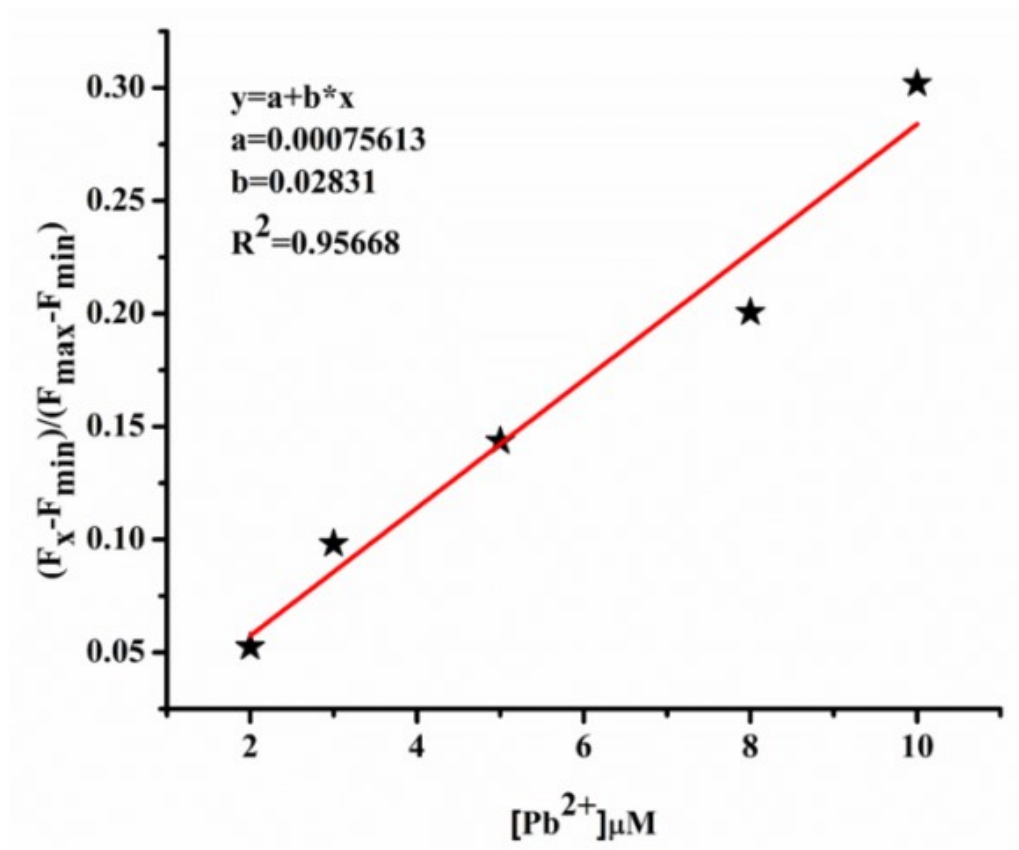

**Figure S12b** Determination of the detection limit based on change in the ratio ( $\lambda_{ex} = 410\text{nm}$ ,  $\lambda_{em} = 463\text{nm}$ ) of **M1** ( $20\ \mu\text{M}$ ) with  $Pb^{2+}$

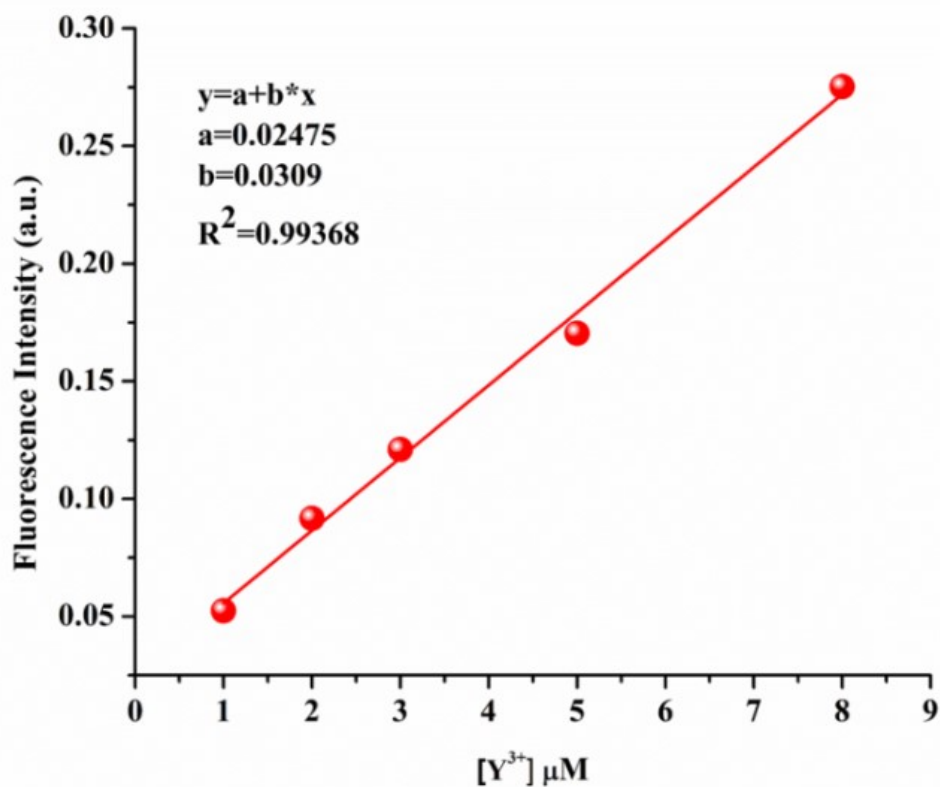

**Figure S12c** Determination of the detection limit based on change in the ratio ( $\lambda_{\text{ex}} = 342\text{nm}$ ,  $\lambda_{\text{em}} = 497\text{nm}$ ) of **M2** (20  $\mu\text{M}$ ) with  $\text{Y}^{3+}$

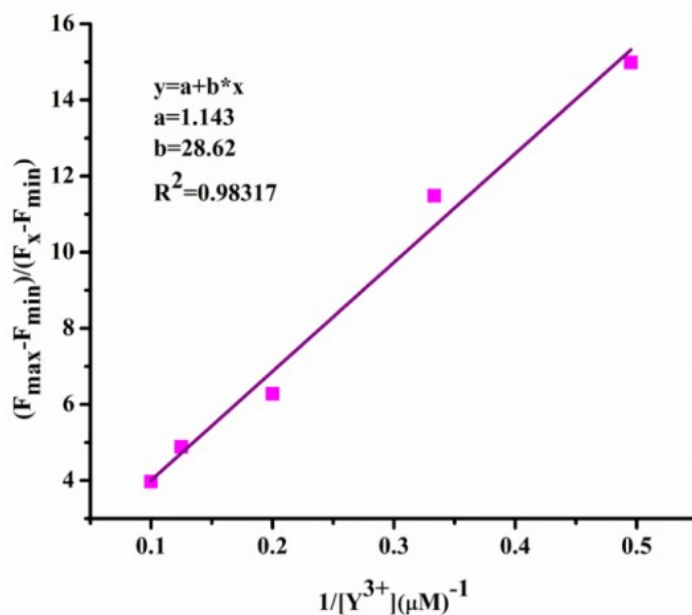

**Figure S13a** Benesi–Hildebrand plot for determination of association constant of **M1** with  $\text{Y}^{3+}$  (linear portion only) ( $\lambda_{\text{ex}} = 410\text{ nm}$ ,  $\lambda_{\text{em}} = 527\text{nm}$ )

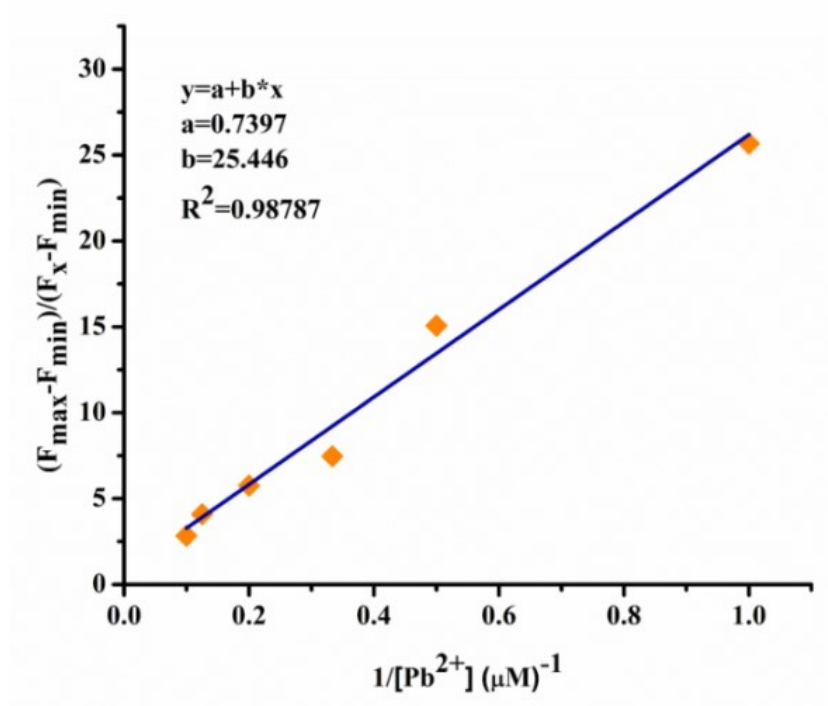

**Figure S13b** Benesi–Hildebrand plot for determination of association constant of **M1** with  $Pb^{2+}$  (linear portion only) ( $\lambda_{ex} = 410$  nm,  $\lambda_{em} = 463$  nm)

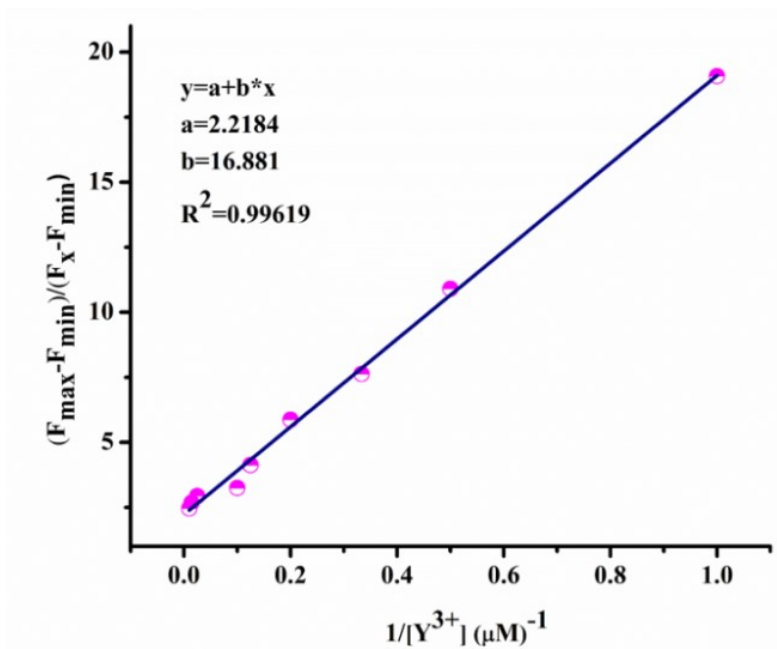

**Figure S13c** Benesi–Hildebrand plot for determination of association constant of **M2** with  $Y^{3+}$  (linear portion only) ( $\lambda_{ex} = 342$  nm,  $\lambda_{em} = 497$  nm)

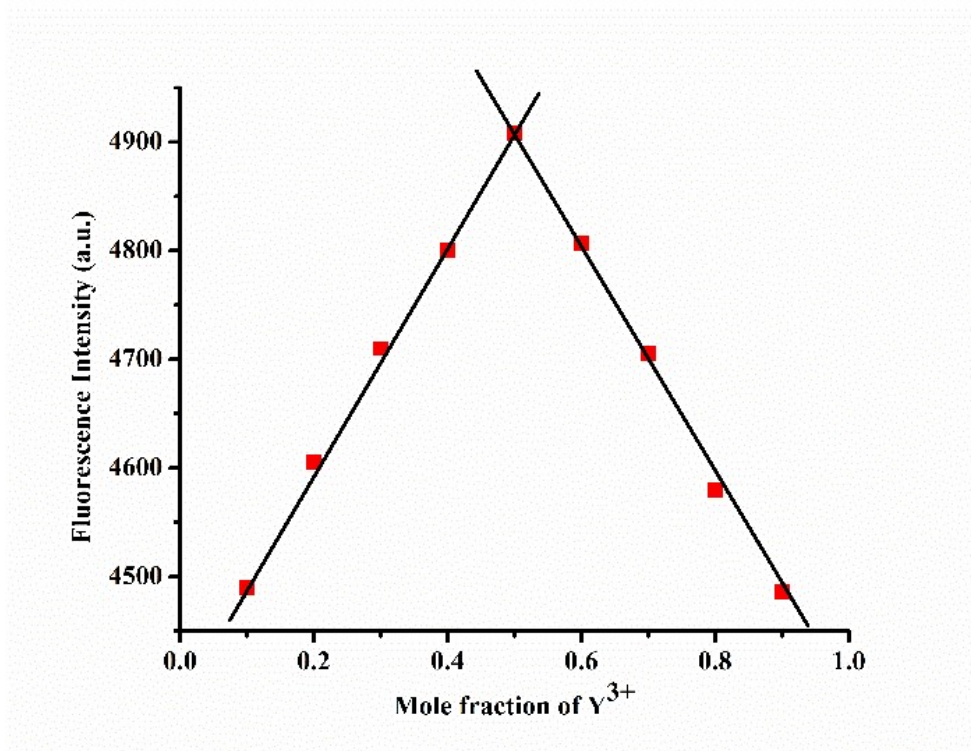

**Figure S14a** Job's plot for stoichiometry determination of  $[M1-Y^{3+}]$  adduct ( $\lambda_{ex} = 410 \text{ nm}$ ,  $\lambda_{em} = 527 \text{ nm}$ )

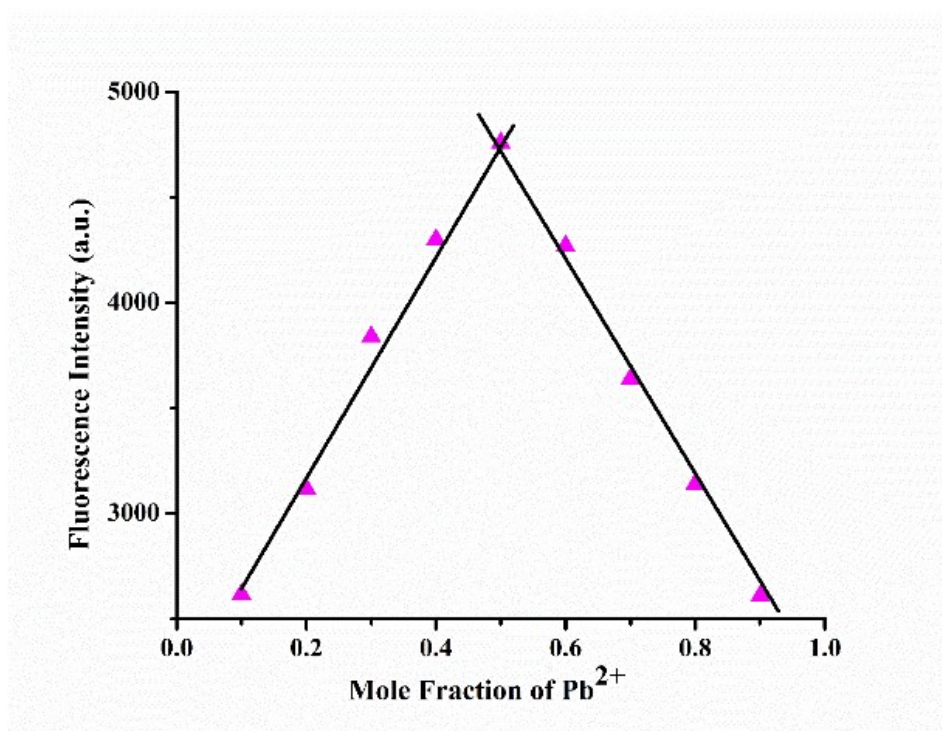

**Figure S14b** Job's plot for stoichiometry determination of  $[M1-Pb^{2+}]$  adduct ( $\lambda_{ex} = 410 \text{ nm}$ ,  $\lambda_{em} = 463 \text{ nm}$ )



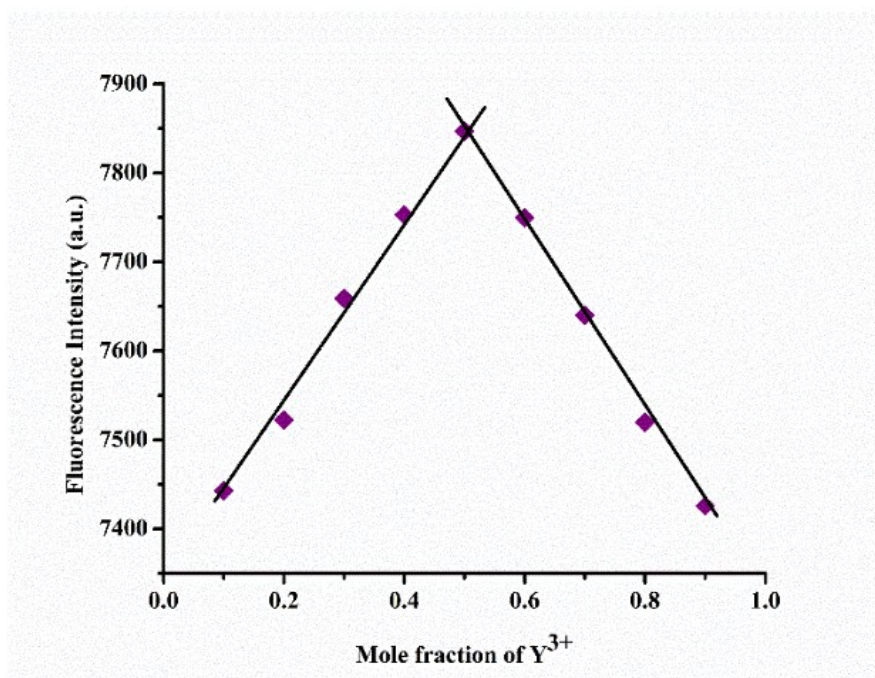

**Figure S14c** Job's plot for stoichiometry determination of  $[M2-Y^{3+}]$  adduct ( $\lambda_{ex} = 342 \text{ nm}$ ,  $\lambda_{em} = 497 \text{ nm}$ )

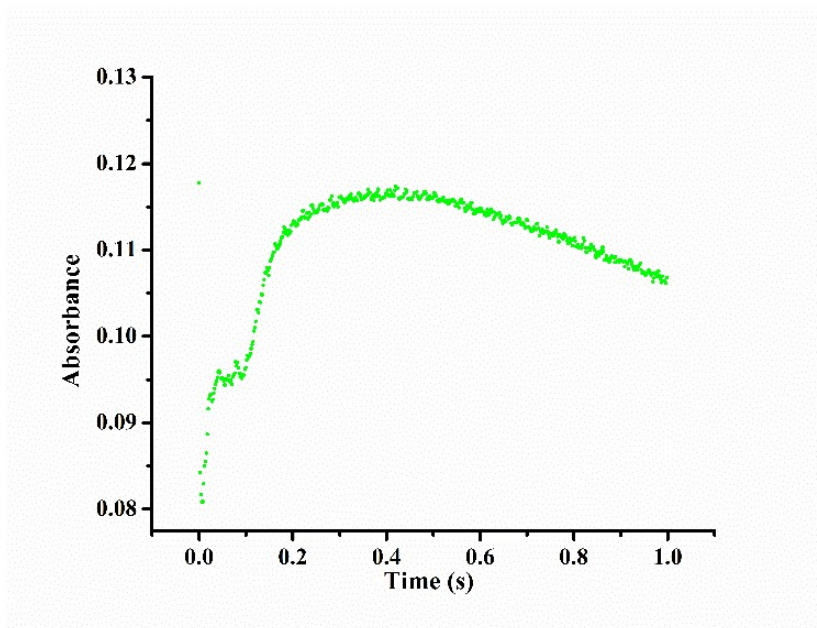

**Figure S15a** Change of absorbance ( $\lambda = 426 \text{ nm}$ ) of **M1** ( $20 \mu\text{M}$ , pH 7.4) saturated with  $Pb^{2+}$  upon irradiation with 2 MeV electrons (noisy curve)

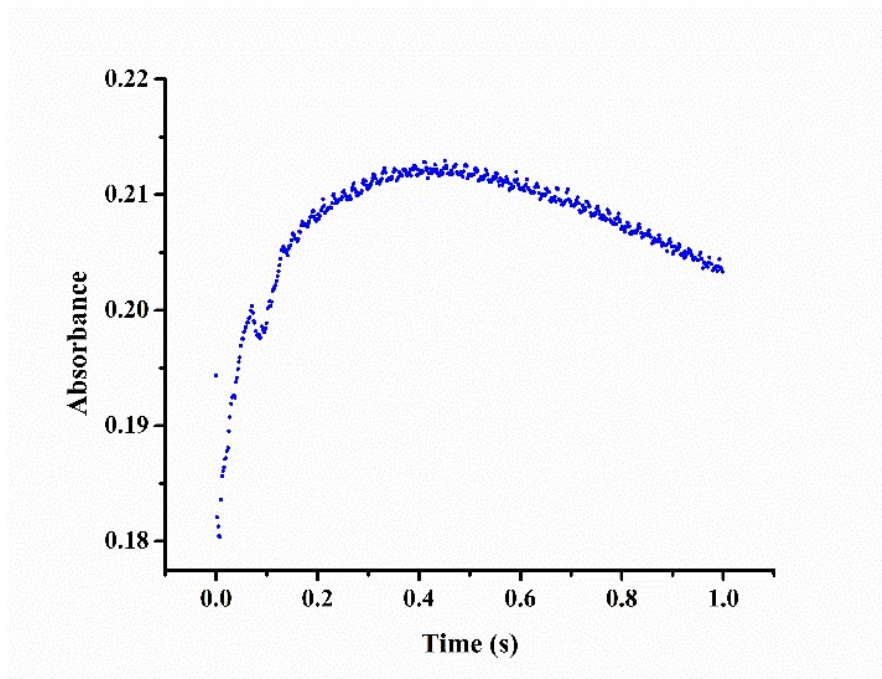

**Figure S15b** Change of absorbance ( $\lambda = 426$  nm) of **M1** ( $20 \mu\text{M}$ , pH 7.4) saturated with  $\text{Y}^{3+}$  upon irradiation with 2 MeV electrons (noisy curve)

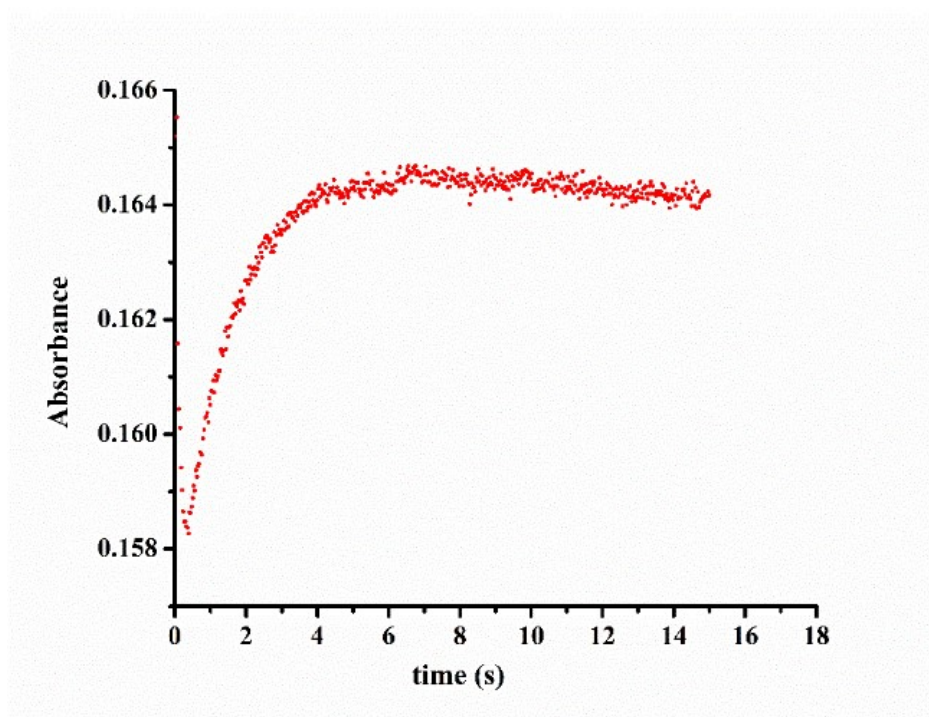

**Figure S15c** Change of absorbance of  $20 \mu\text{M}$  **M2** at 440 nm (pH 7.4) saturated with  $\text{Y}^{3+}$  upon irradiation with 2 MeV electrons (noisy curve)

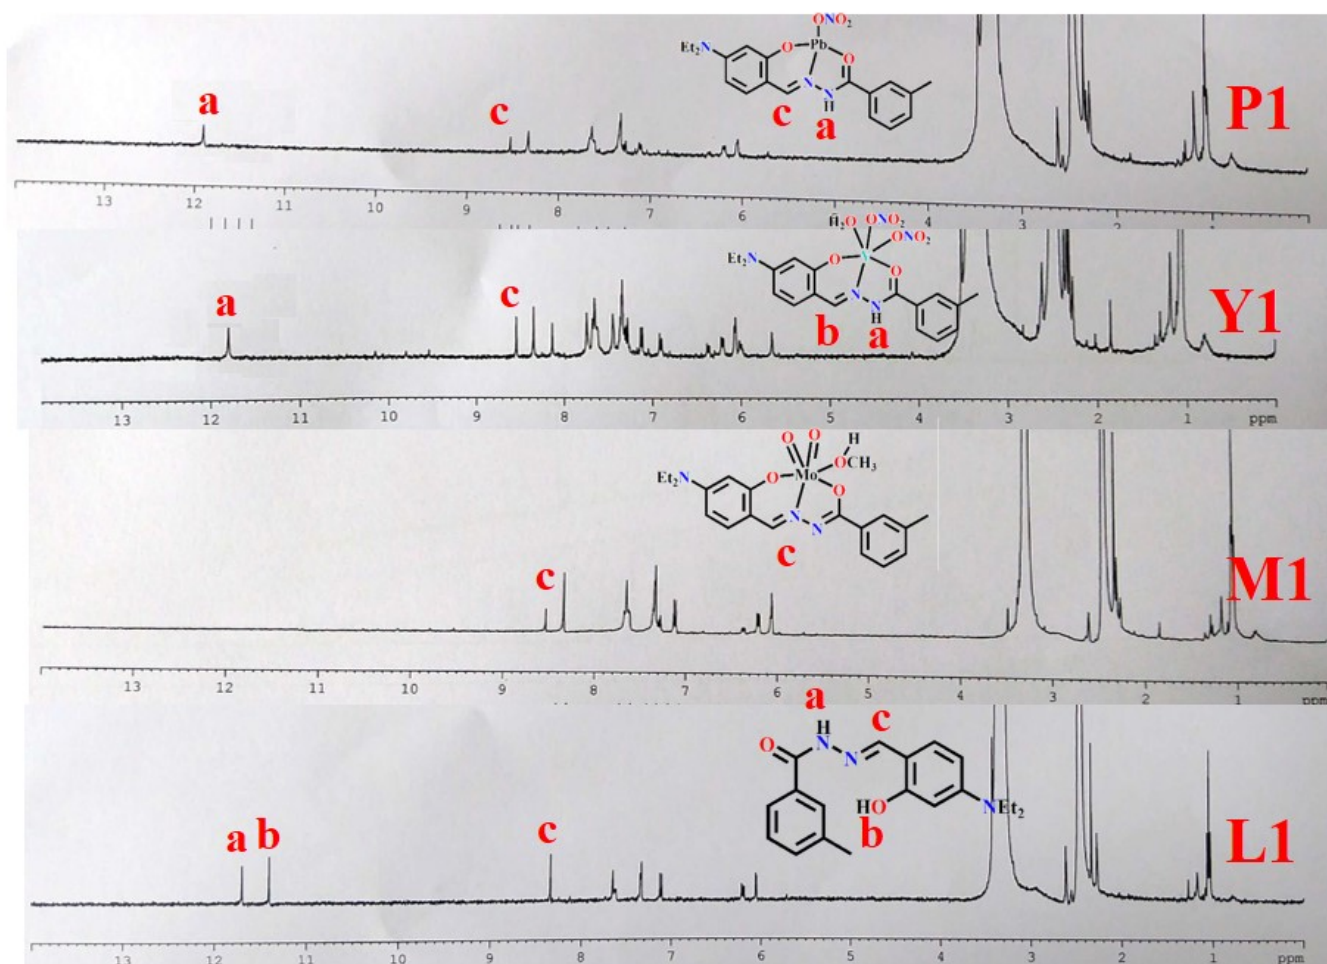

Figure S16a  $^1\text{H}$ NMR titration of M1 with  $\text{Y}^{3+}$  and  $\text{Pb}^{2+}$

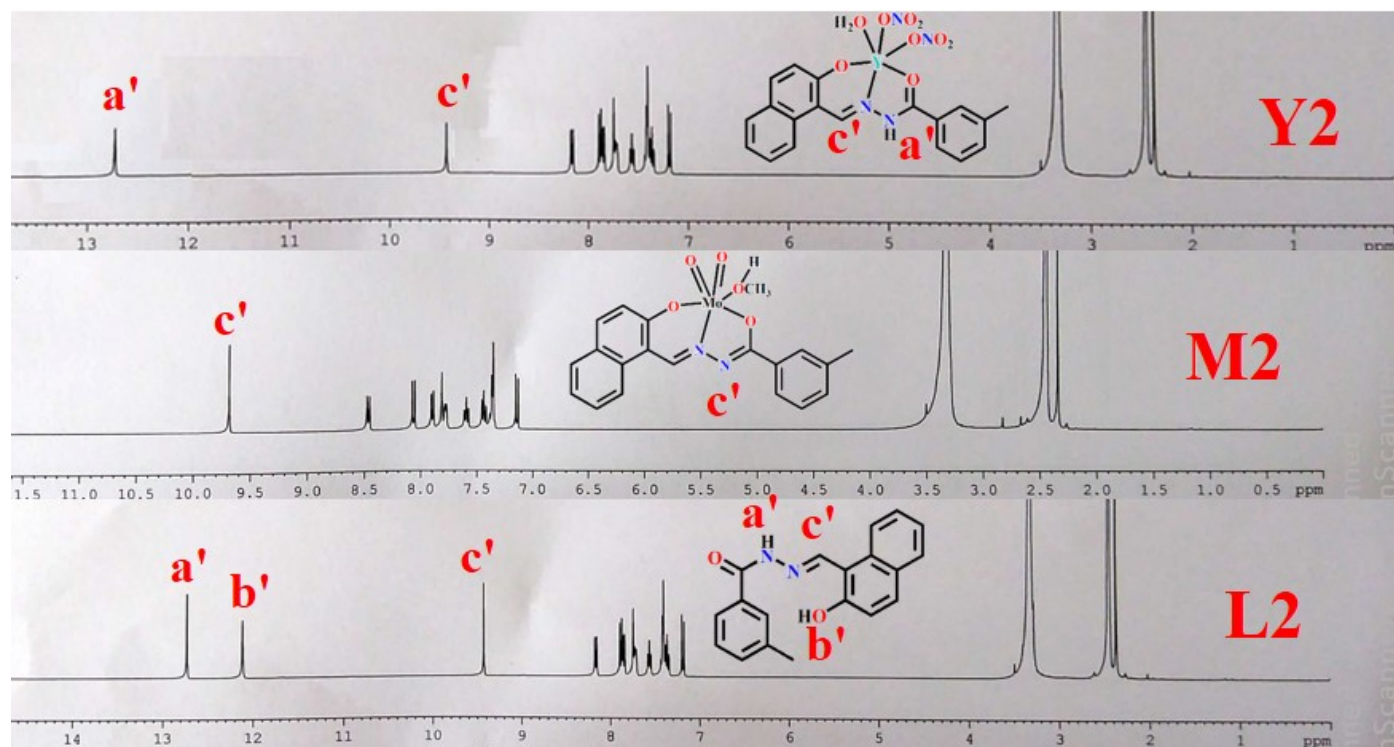

Figure S16b  $^1\text{H}$ NMR titration of M2 with  $\text{Y}^{3+}$

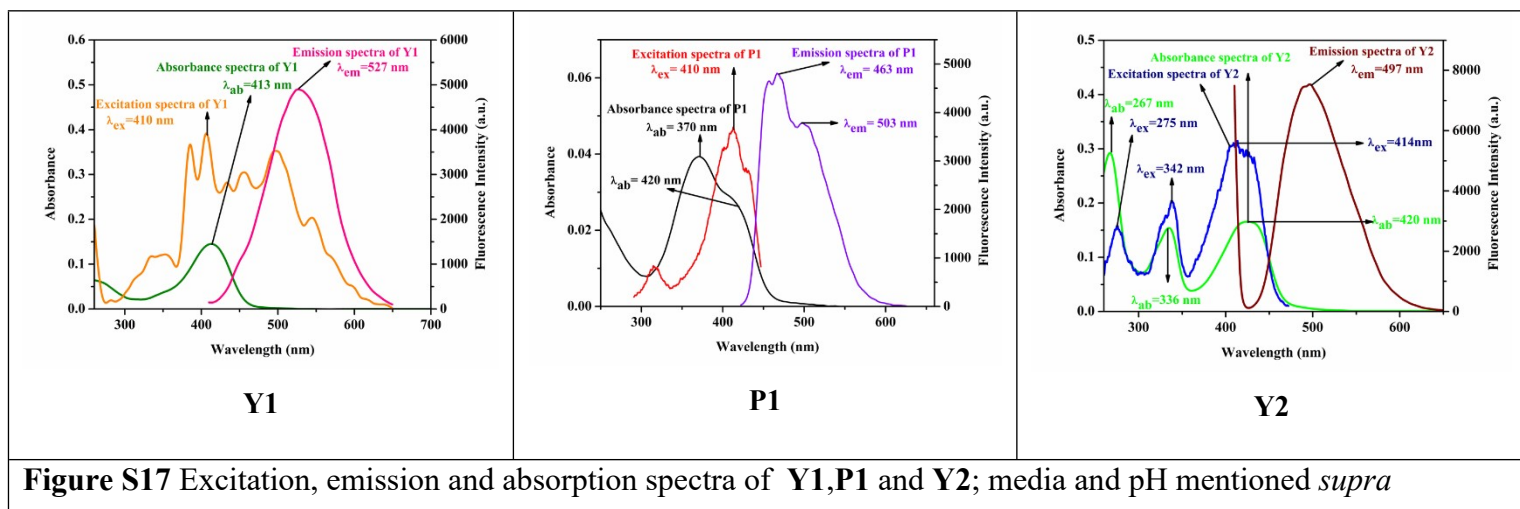

Figure S17 Excitation, emission and absorption spectra of Y1, P1 and Y2; media and pH mentioned *supra*

Table S1 Comparison among pioneering  $\text{Y}^{3+}$  selective probes

| Sl. No. | Media                      | Method                    | Mechanism          | LOD                            | Binding constant                  | Ref.      |
|---------|----------------------------|---------------------------|--------------------|--------------------------------|-----------------------------------|-----------|
| 1.      | 60% EtOH                   | Fluorescence method       | CHEF               | 100 ppb                        | -                                 | 61        |
| 2.      | $\text{H}_2\text{O}$       | Colorimetric method       | Aggregation        | 57.7 nM                        | -                                 | 62        |
| 3.      | THF                        | Fluorescence method       | ICT                | 13 ppm                         | $2.70 \times 10^8 \text{ M}^{-1}$ | 63        |
| 4.      | -                          | Fluorescence method       | (LIBS-LIF)         | 0.3 ppm                        | -                                 | 64        |
| 5.      | Dilute $\text{HNO}_3$      | Spectrophotometric method | Precipitation      | 1 ppm                          | -                                 | 65        |
| 6.      | EtOH/ $\text{H}_2\text{O}$ | Fluorescence method       | Metal displacement | $5.5 \times 10^{-7} \text{ M}$ | $3.9 \times 10^4 \text{ M}^{-1}$  | This work |

**Table S2** Comparison among pioneering Pb<sup>2+</sup> selective probes

| Sl. No. | Media                                     | Sensing mode | Mechanism               | LOD     | Binding constant                       | Ref.         |
|---------|-------------------------------------------|--------------|-------------------------|---------|----------------------------------------|--------------|
| 1.      | CH <sub>3</sub> CN/HEPES (9 : 1, v/v)     | Turn-Off     | PET                     | 0.5 μM  | 2.043×10 <sup>3</sup> M <sup>-1</sup>  | 66           |
| 2.      | CH <sub>3</sub> CN                        | Turn-On      | CHEF                    | 13.2 nM | 6.1 × 10 <sup>5</sup> M <sup>-1</sup>  | 67           |
| 3.      | 1:9 DMSO/H <sub>2</sub> O (v/v)           | Turn-Off     | Receptor- metal complex | 1.9 nM  | 6.76 × 10 <sup>6</sup> M <sup>-1</sup> | 68           |
| 4.      | CH <sub>3</sub> CN/H <sub>2</sub> O (2:8) | Turn-On      | CHEF                    | 2ppb    | -                                      | 69           |
| 5.      | THF/H <sub>2</sub> O                      | Turn-On      | SPR                     | 0.5 μM  | -                                      | 70           |
| 6.      | EtOH/H <sub>2</sub> O                     | Turn-On      | Metal displacement      | 26 nM   | 2.9×10 <sup>4</sup> M <sup>-1</sup>    | Present work |

**Table S3**Crystal data and structure refinement for **M1** and **M2**

| Crystal parameters                     | <b>M1</b>                                                       | <b>M2</b>                                                       |
|----------------------------------------|-----------------------------------------------------------------|-----------------------------------------------------------------|
| CCDC                                   | <b>1941205</b>                                                  | <b>1919499</b>                                                  |
| Empirical formula                      | C <sub>20</sub> H <sub>24</sub> MoN <sub>3</sub> O <sub>5</sub> | C <sub>20</sub> H <sub>17</sub> MoN <sub>2</sub> O <sub>5</sub> |
| Formula weight                         | 482.36                                                          | 461.30                                                          |
| Crystal system                         | Orthorhombic                                                    | Monoclinic                                                      |
| Space group                            | P n a 21                                                        | P 21/c                                                          |
| Hall group                             | P 2c -2n                                                        | -P 2ybc                                                         |
| Temperature                            | 150 K                                                           | 150 K                                                           |
| Wavelength                             | 0.71073                                                         | 0.71073                                                         |
| <i>a</i> /Å                            | 13.7533(17)                                                     | 7.7042(4)                                                       |
| <i>b</i> /Å                            | 20.0569(10)                                                     | 16.2189(8)                                                      |
| <i>c</i> /Å                            | 7.505(2)                                                        | 14.9336(7)                                                      |
| $\alpha$ /°                            | 90                                                              | 90                                                              |
| $\beta$ /°                             | 90                                                              | 102.051(2)                                                      |
| $\gamma$ /°                            | 90                                                              | 90                                                              |
| Volume/Å <sup>3</sup>                  | 2070.2(6)                                                       | 1824.89(16)                                                     |
| <i>Z</i>                               | 4                                                               | 4                                                               |
| $\rho_{\text{calc}}$ g/cm <sup>3</sup> | 1.548                                                           | 1.679                                                           |
| $\mu$ /mm <sup>-1</sup>                | 0.670                                                           | 0.755                                                           |
| F(000)                                 | 988.0                                                           | 932.0                                                           |
| F(000')                                | 981.50                                                          | 925.50                                                          |
| $\Theta_{\text{max}}$                  | 25.370                                                          | 29.180                                                          |

|                              |               |               |
|------------------------------|---------------|---------------|
| Index ranges (h,k,lmax)      | 16,24,9       | 10,22,20      |
| Reflections collected (R)    | 0.0843( 2267) | 0.0264( 4175) |
| wR <sub>2</sub> (Reflection) | 0.2984( 2976) | 0.0703( 4945) |
| S                            | 1.280         | 1.074         |
| Npar                         | 266           | 255           |
| Data completeness            | 1.45/0.79     | 0.999         |

**Table S4a** Selected bond lengths and angles of **M1**

| <b>Atoms</b> | <b>Bond length</b> | <b>Atoms</b> | <b>Bond angle</b> |
|--------------|--------------------|--------------|-------------------|
| Mo O4        | 1.69(2)            | O4 Mo O5     | 105.7(10)         |
| Mo O5        | 1.727(16)          | O4 Mo O2     | 98.2(8)           |
| Mo O2        | 1.925(15)          | O5 Mo O2     | 103.9(7)          |
| Mo O1        | 2.012(13)          | O4 Mo O1     | 97.2(9)           |
| Mo N2        | 2.20(2)            | O2 Mo O1     | 149.8(6)          |
| Mo O3        | 2.385(17)          | O4 Mo N2     | 94.1(9)           |
| O1 C1        | 1.29(3)            | O5 Mo N2     | 158.2(9)          |
| O2 C11       | 1.34(3)            | O2 Mo N2     | 81.9(7)           |
| O3 C20       | 1.40(3)            | O1 Mo N2     | 71.1(7)           |
| N1 C1        | 1.28(3)            | O4 Mo O3     | 170.3(8)          |
| N1 N2        | 1.43(3)            | O5 Mo O3     | 83.9(8)           |
| N2 C9        | 1.34(3)            | O2 Mo O3     | 80.7(6)           |
| N3 C13       | 1.38(3)            | O1 Mo O3     | 79.8(8)           |
| N3 C18       | 1.49(4)            | N2 Mo O3     | 76.2(7)           |
| N3 C16       | 1.53(3)            | C1 O1 Mo     | 119.1(14)         |
| C1 C2        | 1.51(3)            | C11 O2 Mo    | 133.1(16)         |
| C2 C3        | 1.40(3)            | C20 O3 Mo    | 128.8(14)         |
| C2 C7        | 1.42(3)            | C1 N1 N2     | 105.5(18)         |
| C3 C4        | 1.38(3)            | C9 N2 N1     | 116(2)            |
| C4 C5        | 1.37(3)            | C9 N2 Mo     | 126.2(17)         |
| C4 C8        | 1.56(3)            | N1 N2 Mo     | 117.0(12)         |
| C5 C6        | 1.35(3)            | C13 N3 C18   | 123(2)            |
| C6 C7        | 1.43(3)            | C13 N3 C16   | 122(2)            |
| C9 C10       | 1.38(3)            | C18 N3 C16   | 113(2)            |
| C10 C11      | 1.45(3)            | N1 C1 O1     | 127(2)            |
| C10 C15      | 1.46(3)            | N1 C1 C2     | 118(2)            |
| C11 C12      | 1.43(3)            | O1 C1 C2     | 115.5(19)         |
| C12 C13      | 1.39(3)            | C3 C2 C7     | 118(2)            |
| C13 C14      | 1.37(4)            | C3 C2 C1     | 119(2)            |
| C14 C15      | 1.33(3)            | C7 C2 C1     | 124(2)            |
| C16 C17      | 1.50(4)            | C4 C3 C2     | 122(2)            |

|         |         |             |        |
|---------|---------|-------------|--------|
| C18 C19 | 1.53(4) | C5 C4 C3    | 118(2) |
|         |         | C5 C4 C8    | 120(2) |
|         |         | C3 C4 C8    | 122(2) |
|         |         | C6 C5 C4    | 124(2) |
|         |         | C5 C6 C7    | 119(2) |
|         |         | C2 C7 C6    | 119(2) |
|         |         | N2 C9 C10   | 126(2) |
|         |         | C9 C10 C11  | 123(2) |
|         |         | C9 C10 C15  | 123(2) |
|         |         | C11 C10 C15 | 114(2) |
|         |         | O2 C11 C12  | 119(2) |
|         |         | O2 C11 C10  | 120(2) |
|         |         | C12 C11 C10 | 121(2) |
|         |         | C13 C12 C11 | 118(2) |
|         |         | C14 C13 N3  | 120(2) |
|         |         | C14 C13 C12 | 123(3) |
|         |         | N3 C13 C12  | 117(2) |
|         |         | C15 C14 C13 | 121(3) |
|         |         | C14 C15 C10 | 123(2) |
|         |         | C17 C16 N3  | 109(2) |
|         |         | N3 C18 C19  | 111(3) |

**Table S4b** Selected bond lengths and angles of **M2**

| <b>Atoms</b> | <b>Bond length</b> | <b>Atoms</b> | <b>Bond angle</b> |
|--------------|--------------------|--------------|-------------------|
| Mo O1        | 2.0093(14)         | O2 Mo O1     | 149.77(6)         |
| Mo O2        | 1.9286(14)         | O3 Mo O1     | 96.89(6)          |
| Mo O3        | 1.7046(15)         | O3 Mo O2     | 103.41(7)         |
| Mo O4        | 1.6945(15)         | O4 Mo O1     | 96.35(7)          |
| Mo O5        | 2.3456(14)         | O4 Mo O2     | 99.26(7)          |
| Mo N2        | 2.2269(16)         | O4 Mo O3     | 105.99(8)         |
| O1 C1        | 1.310(2)           | O5 Mo O1     | 78.51(6)          |
| O2 C11       | 1.342(2)           | O5 Mo O2     | 82.45(6)          |
| O5 C20       | 1.401(3)           | O5 Mo O3     | 81.78(6)          |
| N1 N2        | 1.401(2)           | O5 Mo O4     | 171.28(6)         |
| N1 C1        | 1.311(2)           | N2 Mo O1     | 72.13(6)          |
| N2 C9        | 1.294(2)           | N2 Mo O2     | 80.32(6)          |
| C1 C2        | 1.472(3)           | N2 Mo O3     | 155.41(7)         |
| C2 C3        | 1.396(3)           | N2 Mo O4     | 97.21(7)          |
| C2 C7        | 1.393(3)           | N2 Mo O5     | 74.57(5)          |
| C3 C4        | 1.384(3)           | C1 O1 Mo     | 120.22(12)        |
| C4 C5        | 1.384(3)           | C11 O2 Mo    | 136.27(13)        |
| C5 C6        | 1.391(3)           | C20 O5 Mo    | 124.88(15)        |
| C6 C7        | 1.391(3)           | C1 N1 N2     | 109.62(15)        |

|         |          |             |            |
|---------|----------|-------------|------------|
| C6 C8   | 1.503(3) | N1 N2 Mo    | 115.19(11) |
| C9 C10  | 1.444(2) | C9 N2 Mo    | 128.85(13) |
| C10 C11 | 1.395(3) | C9 N2 N1    | 115.96(15) |
| C10 C19 | 1.449(3) | N1 C1 O1    | 122.70(17) |
| C11 C12 | 1.415(3) | C2 C1 O1    | 117.50(16) |
| C12 C13 | 1.363(3) | C2 C1 N1    | 119.78(17) |
| C13 C14 | 1.416(3) | C3 C2 C1    | 120.03(18) |
| C14 C15 | 1.417(3) | C7 C2 C1    | 120.44(17) |
| C14 C19 | 1.422(3) | C7 C2 C3    | 119.54(18) |
| C15 C16 | 1.367(3) | C4 C3 C2    | 119.2(2)   |
| C16 C17 | 1.402(3) | C5 C4 C3    | 120.7(2)   |
| C17 C18 | 1.376(3) | C6 C5 C4    | 121.15(19) |
| C18 C19 | 1.412(3) | C7 C6 C5    | 117.9(2)   |
|         |          | C8 C6 C5    | 121.3(2)   |
|         |          | C8 C6 C7    | 120.8(2)   |
|         |          | C6 C7 C2    | 121.55(19) |
|         |          | C10 C9 N2   | 124.51(17) |
|         |          | C11 C10 C9  | 121.12(17) |
|         |          | C19 C10 C9  | 119.45(17) |
|         |          | C19 C10 C11 | 119.30(17) |
|         |          | C10 C11 O2  | 123.24(17) |
|         |          | C12 C11 O2  | 115.77(17) |
|         |          | C12 C11 C10 | 120.93(18) |
|         |          | C13 C12 C11 | 120.07(18) |
|         |          | C14 C13 C12 | 121.50(18) |
|         |          | C15 C14 C13 | 120.68(18) |
|         |          | C19 C14 C13 | 119.64(18) |
|         |          | C19 C14 C15 | 119.68(19) |
|         |          | C16 C15 C14 | 121.13(19) |
|         |          | C17 C16 C15 | 119.2(2)   |
|         |          | C18 C17 C16 | 121.2(2)   |
|         |          | C19 C18 C17 | 120.99(19) |
|         |          | C14 C19 C10 | 118.54(17) |
|         |          | C18 C19 C10 | 123.67(17) |
|         |          | C18 C19 C14 | 117.79(18) |
